# Supplementary material for: The Use of Targeted Next Generation Sequencing to Explore Candidate Regulators of TGF-β1’s Impact on Kidney Cells
Source: Front Physiol. 2018 Dec 10;9:1755. doi: 10.3389/fphys.2018.01755 (PMC6295563; doi:10.3389/fphys.2018.01755)
Supplement: TABLE S1 — The full list of differentially expressed gene sets between control and TGF-β samples. [file Table_1.XLS]

## Sheet: Supplemental table 
Supplemental Table 1
GeneID	Symbol	log2FoldChange	P.value	P.adj
NM_021446	0610007P14Rik	0.859033	3.01692e-08	3.45193e-07
NM_024179	0610009O20Rik	-0.602994	0.000197231	0.00119105
NM_027860	0610010F05Rik	1.27293	5.15921e-14	1.11225e-12
NM_026696	0610030E20Rik	-0.496685	0.00555767	0.0230434
NR_027874	0610040B10Rik	-1.46747	0.00398612	0.0172225
NR_030694	1110002L01Rik	1.74681	0.00137496	0.00675408
NR_027810	1110006O24Rik	-0.771005	0.0119913	0.0445359
NM_026124	1110008F13Rik	0.887461	2.00247e-07	2.05147e-06
NM_023483	1110032A03Rik	-0.827909	5.70175e-06	4.69296e-05
NM_028637	1110034G24Rik	-1.10272	0.000189295	0.0011494
NM_001081183	1110037F02Rik	0.508007	0.000298586	0.00173244
NR_015536	1110038B12Rik	1.25694	0.00638691	0.0259269
NM_175123	1110051M20Rik	-0.471763	0.00280947	0.0127511
NM_025423	1110059E24Rik	0.44906	0.00974083	0.0372214
NM_197988	1190005I06Rik	-2.29298	0.00258086	0.0118105
NR_027818	1500011B03Rik	-2.16049	0.00103231	0.00525635
NR_029432	1500015A07Rik	-0.781993	0.0134727	0.0493613
NM_024283	1500015O10Rik	-13.9445	9.34987e-06	7.39454e-05
NM_027207	1600002K03Rik	-1.03319	2.12066e-05	0.000156584
NM_027948	1700003E16Rik	-1.81764	0.00113863	0.00573555
NR_024331	1700008J07Rik	-1.03465	0.000191983	0.00116325
NM_001081095	1700009N14Rik	2.39071	9.55434e-09	1.16694e-07
NM_025956	1700011H14Rik	-6.69622	1.13188e-51	1.4475e-49
NM_027077	1700016C15Rik	-3.52329	0.00159859	0.00771174
NM_028820	1700017B05Rik	0.932392	7.15991e-05	0.000474275
NM_175241	1700028K03Rik	-0.938086	0.00500723	0.0210513
NM_001033148	1700029J07Rik	-1.69129	4.70343e-12	8.56781e-11
NM_028170	1700030K09Rik	-0.785784	3.49715e-06	2.99785e-05
NR_030669	1700034H15Rik	-3.4236	0.00188779	0.00892345
NR_027956	1700052K11Rik	-0.629882	0.0060185	0.0246604
NR_038029	1700061I17Rik	2.87185	1.76488e-14	4.01184e-13
NR_033608	1700084J12Rik	-2.56801	0.00676154	0.0272593
NM_138581	1700088E04Rik	-1.70917	3.98435e-06	3.38005e-05
NM_028567	1700094D03Rik	-0.917999	2.092e-05	0.000154711
NR_015485	1700108F19Rik	-3.96361	3.89081e-05	0.00027201
NM_026931	1810011O10Rik	2.70513	1.4431e-29	8.14679e-28
NM_001081400	1810013L24Rik	0.636362	1.01783e-05	7.9959e-05
NR_037569	1810026B05Rik	-0.76175	1.66837e-05	0.000125757
NM_026431	1810043G02Rik	-0.962896	0.00311417	0.0139289
NM_028077	1810055G02Rik	0.703564	2.09747e-06	1.8608e-05
NM_027360	2010107E04Rik	0.415324	0.00979243	0.0373858
NR_027924	2010204K13Rik	-2.52158	5.62455e-06	4.63348e-05
NM_028211	2210016L21Rik	-0.374049	0.00969328	0.0370751
NR_044985	2210039B01Rik	-1.44506	0.000544165	0.00296859
NR_033514	2310015A10Rik	-1.25653	2.9457e-05	0.000211147
NM_175149	2310022B05Rik	-1.35285	2.18521e-24	9.23142e-23
NM_024210	2310033P09Rik	-0.875224	0.000409937	0.00230042
NM_026655	2310057M21Rik	0.974143	2.36713e-06	2.08625e-05
NR_040318	2500004C02Rik	-2.46031	2.02974e-23	8.11851e-22
NM_001033164	2510002D24Rik	-1.11554	0.00115314	0.00579621
NR_024619	2610001J05Rik	0.47922	0.00160848	0.0077513
NM_001004362	2610008E11Rik	-1.29961	9.59426e-14	2.01522e-12
NR_015556	2610035D17Rik	-0.728817	9.88113e-05	0.000637054
NR_028298	2610306M01Rik	-0.87964	0.00156889	0.00759557
NR_037964	2610507I01Rik	-1.07711	1.42231e-08	1.7074e-07
NR_033198	2700046G09Rik	-0.922423	0.00683092	0.0274985
NM_175381	2700081O15Rik	-0.768468	2.67279e-08	3.07878e-07
NR_045268	2810013P06Rik	-1.02478	9.5693e-08	1.02737e-06
NR_027984	2810025M15Rik	1.4406	1.28965e-17	3.61853e-16
NR_030682	2810410L24Rik	-1.7983	3.73655e-07	3.72644e-06
NR_029441	2810454H06Rik	-1.48184	0.00704318	0.0282373
NM_026054	2810474O19Rik	0.358666	0.00691149	0.0277508
NM_144518	2900011O08Rik	-2.16067	0.00143226	0.00701172
NR_024329	2900097C17Rik	0.42342	0.00153199	0.00743765
NR_033215	3000002C10Rik	-1.75733	1.16318e-06	1.075e-05
NM_029623	3110002H16Rik	0.743252	1.15591e-06	1.06939e-05
NM_001081343	3110043O21Rik	0.933449	1.81202e-09	2.46307e-08
NR_045056	3110056K07Rik	-0.852049	0.00616514	0.0251625
NR_040276	4732490B19Rik	-4.02917	0.00501497	0.0210768
NR_030700	4831440E17Rik	-1.98823	2.55229e-13	5.18148e-12
NR_028313	4833422C13Rik	3.47019	4.29825e-25	1.88352e-23
NR_028314	4833422C13Rik	3.67123	1.3042e-18	3.9481e-17
NM_133797	4833439L19Rik	0.654304	1.40542e-06	1.28317e-05
NM_025722	4921524J17Rik	1.43152	2.46598e-14	5.53858e-13
NR_024323	4930426L09Rik	2.10452	0.000110097	0.000702076
NM_134041	4930427A07Rik	1.58693	0.000319337	0.00184122
NR_027966	4930429B21Rik	1.07444	3.69486e-06	3.1501e-05
NR_045168	4930447N08Rik	-4.48483	0.000409724	0.00229991
NM_026273	4930453N24Rik	0.472641	0.00535122	0.0222895
NM_178098	4930486L24Rik	2.7162	1.86222e-12	3.52192e-11
NM_172967	4930503L19Rik	0.593155	0.00874541	0.0339629
NM_026263	4930519G04Rik	-1.37025	0.00058066	0.00314305
NM_001162896	4930523C07Rik	-2.03964	1.9942e-29	1.11575e-27
NR_045065	4930556M19Rik	-1.31601	0.00467645	0.0198359
NR_038053	4930579G18Rik	-1.65904	0.0068215	0.0274716
NR_029475	4930581F22Rik	-1.7245	0.00502131	0.021094
NM_172741	4931406P16Rik	1.12866	1.10635e-14	2.58044e-13
NM_028890	4931414P19Rik	-0.978925	1.36281e-05	0.000104399
NM_176829	4931440F15Rik	-13.3594	0.000488248	0.00269483
NR_029452	4932416H05Rik	-0.870377	0.000630263	0.00337463
NM_177773	4933408B17Rik	-2.22089	3.81438e-08	4.31707e-07
NR_045342	4933411E08Rik	-3.85734	0.011399	0.0426363
NR_040454	4933417E11Rik	14.1221	1.95409e-06	1.7443e-05
NR_045372	4933424G05Rik	-1.62741	0.00044216	0.00246141
NM_025762	4933434E20Rik	0.621689	0.00159113	0.00768543
NR_015585	4933439C10Rik	-1.39568	5.14566e-07	5.0225e-06
NR_033624	5031434O11Rik	-1.99181	0.00761735	0.0302107
NM_001033273	5031439G07Rik	0.67354	4.84428e-06	4.04026e-05
NR_029464	5033406O09Rik	1.70588	0.00599384	0.0245861
NR_034038	5430416N02Rik	1.39809	1.05421e-08	1.27942e-07
NM_028872	5730559C18Rik	0.957973	5.29118e-08	5.89271e-07
NM_176921	6030419C18Rik	1.36896	0.00874592	0.0339629
NM_001166360	6030458C11Rik	-1.38902	0.0107183	0.0404523
NR_003619	6330549D23Rik	-1.19865	0.0018294	0.00868238
NR_015515	6430562O15Rik	-1.69349	0.000103314	0.000663544
NM_176952	6430573F11Rik	-5.07526	1.44528e-23	5.85556e-22
NR_040291	6430706D22Rik	-1.39871	5.69513e-22	2.10339e-20
NM_173381	6720489N17Rik	-1.20522	6.31114e-05	0.00042282
NM_178670	8030462N17Rik	1.13224	5.97616e-07	5.78804e-06
NM_001123370	9030025P20Rik	-0.978335	2.27442e-10	3.44258e-09
NR_024328	9230116N13Rik	-2.63703	0.000429502	0.00239733
NR_033222	9330151L19Rik	-0.605973	0.00877523	0.0340346
NM_001081963	9430020K01Rik	-0.465093	0.000895797	0.00463659
NR_040272	9530051G07Rik	-2.66834	0.00208584	0.00974445
NM_026739	9530077C05Rik	-1.37855	0.00187417	0.00886354
NR_033299	9530091C08Rik	-1.58372	1.99891e-05	0.000148293
NM_001004155	9930012K11Rik	-2.19674	0.00605667	0.0248005
NM_001114679	9930111J21Rik1	3.08642	1.30257e-22	4.98719e-21
NR_040616	A130077B15Rik	-0.791834	4.33787e-06	3.65309e-05
NR_015566	A330023F24Rik	-1.55511	2.90684e-08	3.33409e-07
NR_015503	A330040F15Rik	-15.4772	5.25765e-12	9.54962e-11
NM_183025	A430033K04Rik	-0.833302	0.00059245	0.00319675
NR_015491	A630089N07Rik	-1.06339	0.00308814	0.0138256
NM_001033325	A630095E13Rik	3.54885	0.00118086	0.00592129
NR_040287	A730020E08Rik	-4.01225	2.11544e-07	2.15897e-06
NR_045195	A830082K12Rik	0.722625	0.00161579	0.00778053
NR_027895	A930005H10Rik	-3.77525	9.00726e-08	9.70914e-07
NR_027894	A930005H10Rik	-3.36554	3.21322e-05	0.000228289
NR_033305	AA388235	-1.77593	2.25835e-05	0.000165709
NM_001004174	AA467197	7.39345	2.89657e-60	4.86183e-58
NM_177604	AA986860	-1.35076	4.60225e-05	0.000317729
NM_153416	Aaas	0.790925	1.23023e-08	1.48466e-07
NM_030210	Aacs	0.920446	1.015e-08	1.23581e-07
NM_146217	Aars	1.34389	3.17759e-25	1.40886e-23
NM_144829	Aarsd1	-0.577733	0.00791933	0.031237
NM_173765	Aasdh	-0.792122	0.00198651	0.00933143
NM_013454	Abca1	-1.66745	1.30918e-32	8.57538e-31
NM_007379	Abca2	-0.764023	3.03481e-05	0.000216842
NM_147219	Abca5	0.686757	0.000533268	0.00291676
NM_147220	Abca9	-4.19257	1.41838e-10	2.18917e-09
NM_011076	Abcb1a	4.22271	9.96482e-06	7.84458e-05
NM_011075	Abcb1b	-0.567209	0.00866469	0.0337102
NM_029020	Abcb8	-0.588054	0.0122702	0.0454337
NM_019875	Abcb9	-2.24453	0.000673272	0.00358348
NM_008576	Abcc1	0.61377	2.11525e-05	0.000156246
NM_029600	Abcc3	-4.78971	2.71369e-13	5.49134e-12
NM_013790	Abcc5	-0.811077	1.36541e-06	1.24907e-05
NM_176839	Abcc5	-1.2137	0.000861881	0.0044783
NM_007435	Abcd1	-0.890367	2.72396e-07	2.75458e-06
NM_008992	Abcd4	-0.852116	3.43417e-05	0.000242703
NM_015751	Abce1	0.822365	1.82493e-10	2.78691e-09
NM_013853	Abcf2	0.78416	0.00474024	0.0200612
NM_029631	Abhd14b	-1.622	1.06015e-23	4.33257e-22
NM_178592	Abhd16a	-0.515729	0.000514425	0.0028219
NM_018811	Abhd2	1.33718	7.61552e-12	1.36477e-10
NM_026179	Abhd5	0.678673	5.13001e-06	4.25571e-05
NM_001014423	Abi3bp	-14.664	4.80996e-09	6.13449e-08
NM_001014424	Abi3bp	-13.4906	0.00304479	0.0136576
NM_175456	Abra	-13.4456	0.000298414	0.00173198
NM_028440	Abracl	1.28802	4.01534e-21	1.41092e-19
NM_030251	Abtb1	-1.44924	7.95934e-14	1.68121e-12
NM_178890	Abtb2	1.3966	3.03655e-11	5.06514e-10
NM_146230	Acaa1b	-3.49703	0.00130194	0.00644932
NM_177470	Acaa2	-1.11201	1.13353e-15	2.84884e-14
NM_133360	Acaca	0.692748	1.1353e-06	1.05291e-05
NM_028037	Acad10	-1.7979	8.8652e-05	0.000575672
NM_175324	Acad11	0.707706	3.41278e-05	0.000241373
NM_178799	Acad12	-2.08009	1.50972e-05	0.000114857
NM_007382	Acadm	-0.996579	6.96384e-12	1.25156e-10
NM_025826	Acadsb	-0.644713	8.92197e-06	7.09793e-05
NM_017366	Acadvl	0.350299	0.0130989	0.0481291
NM_009338	Acat2	1.54473	7.95531e-26	3.6299e-24
NM_133225	Acbd3	0.910656	3.32726e-11	5.5158e-10
NM_025988	Acbd4	-0.733524	0.00131141	0.00649111
NM_183220	Accs	-0.905599	0.000107205	0.000685722
NM_001012638	Acd	-0.664115	2.39815e-06	2.11062e-05
NM_007722	Ackr3	-1.69096	0.000142323	0.000887406
NM_001199296	Acly	2.19136	1.4734e-09	2.0159e-08
NM_134037	Acly	1.45876	1.20639e-05	9.34443e-05
NM_007386	Aco1	0.36167	0.012767	0.0470142
NM_012006	Acot1	-2.317	9.56804e-17	2.54412e-15
NM_028790	Acot12	3.94774	5.69363e-05	0.000384463
NM_019736	Acot9	0.608091	1.32531e-05	0.000101692
NM_021330	Acp1	1.20973	6.71959e-05	0.000448108
NM_001110239	Acp1	0.753212	0.00583188	0.0239846
NM_001127340	Acrbp	-1.81403	1.54567e-06	1.40169e-05
NM_016845	Acrbp	-1.80321	4.66963e-05	0.000321908
NM_053178	Acsbg1	5.87272	2.72527e-93	1.1385e-90
NM_153807	Acsf2	-0.549887	0.00548164	0.0227583
NM_144932	Acsf3	-0.536631	0.00518383	0.0216798
NM_007981	Acsl1	-1.59861	3.16135e-18	9.28597e-17
NM_001033606	Acsl3	3.42986	6.81143e-07	6.5264e-06
NM_028817	Acsl3	2.20929	9.66275e-05	0.000623798
NM_019477	Acsl4	2.67719	0.0011858	0.00593973
NM_207625	Acsl4	2.20192	0.00120212	0.00601349
NM_001033600	Acsl4	4.21281	0.00173917	0.00829605
NM_009606	Acta1	5.35126	8.13021e-60	1.32904e-57
NM_007392	Acta2	1.92845	2.15666e-42	2.04952e-40
NM_007393	Actb	0.924662	6.49054e-09	8.10196e-08
NM_009609	Actg1	1.47826	3.42846e-31	2.12712e-29
NM_009610	Actg2	2.1521	1.36084e-33	9.20234e-32
NM_019673	Actl6a	0.496127	0.0017776	0.00845786
NM_134156	Actn1	1.79764	1.10339e-43	1.11519e-41
NM_021895	Actn4	0.482989	0.000752246	0.0039612
NM_019785	Actr10	0.339412	0.0132701	0.0486572
NM_016860	Actr1a	0.390339	0.00301925	0.0135625
NM_146107	Actr1b	0.750897	5.27766e-08	5.88113e-07
NM_146243	Actr2	1.13725	9.99023e-18	2.83267e-16
NM_175419	Actr5	-0.8253	0.0119971	0.0445455
NM_007395	Acvr1b	-0.770519	0.000980647	0.00501911
NM_009612	Acvrl1	14.5555	1.85259e-08	2.1835e-07
NM_025421	Acyp1	-0.905942	0.000253433	0.00149351
NM_001110778	Adam11	-4.44174	0.000625499	0.00335581
NM_007400	Adam12	3.10636	5.80235e-102	2.87048e-99
NM_009616	Adam19	0.935339	4.16139e-11	6.80853e-10
NM_001098225	Adam22	-2.36649	1.21214e-20	4.14311e-19
NM_007401	Adam5	-3.53318	1.18505e-10	1.84113e-09
NM_007403	Adam8	-0.814435	0.0132504	0.0486036
NM_007404	Adam9	0.384671	0.00449025	0.0191742
NM_009621	Adamts1	-4.08174	2.76133e-116	2.25697e-113
NM_175501	Adamts12	2.07164	1.60423e-19	5.1202e-18
NM_001024139	Adamts15	-12.6818	0.00966703	0.0370022
NM_172053	Adamts16	1.90565	5.054e-14	1.09082e-12
NM_175643	Adamts2	0.60725	0.000349181	0.00199461
NM_172845	Adamts4	1.3184	0.00135675	0.00667686
NM_011782	Adamts5	-1.65686	1.04542e-35	7.647e-34
NM_001081020	Adamts6	2.40123	1.87284e-37	1.46698e-35
NM_175314	Adamts9	-1.18509	0.000171647	0.00105313
NM_001190374	Adamtsl3	3.41051	1.38303e-09	1.89778e-08
NM_144899	Adamtsl4	-2.43559	2.59356e-38	2.09254e-36
NM_013925	Adat1	-0.806232	0.00170768	0.00817485
NM_178873	Adck2	-0.486149	0.0109254	0.0410773
NM_172960	Adck5	-0.69464	5.83814e-05	0.000393092
NM_009622	Adcy1	3.06977	4.47041e-05	0.000309765
NM_007405	Adcy6	-0.712659	0.000287382	0.00167519
NM_054044	Adgra2	-0.392085	0.00263823	0.0120525
NM_133911	Adgra3	0.571943	3.14841e-05	0.000224278
NM_139138	Adgre4	-1.57823	0.00803566	0.0316096
NM_001081178	Adgrf5	1.61837	1.76313e-07	1.82416e-06
NM_001002268	Adgrg6	-0.430458	0.00153232	0.00743765
NM_181039	Adgrl1	-0.567273	3.62605e-05	0.000254922
NM_001081298	Adgrl2	-0.62433	6.66039e-05	0.000444604
NM_028320	Adipor1	0.500247	0.000137367	0.00085993
NM_197985	Adipor2	0.640273	6.21943e-05	0.000417121
NM_182928	Adm2	4.75477	0.000296252	0.00172049
NM_175028	Adnp2	0.430881	0.00876431	0.0340063
NM_001005419	Ado	0.562563	0.000149057	0.000927856
NM_028121	Adpgk	0.609191	8.94355e-05	0.000580358
NM_007414	Adprh	0.484805	0.00412354	0.0177307
NM_013460	Adra1d	-2.85148	1.25852e-29	7.16938e-28
NM_007417	Adra2a	2.24667	0.00017739	0.00108483
NM_009636	Aebp1	-2.17342	5.36585e-30	3.11335e-28
NM_026531	Aen	0.903492	0.0127346	0.046913
NM_027373	Afap1	-0.941042	5.77515e-13	1.13564e-11
NM_178928	Afap1l1	-2.33878	4.88502e-06	4.06703e-05
NM_010806	Afdn	-0.776884	2.81918e-08	3.24146e-07
NM_033565	Aff4	0.964207	9.07434e-13	1.76046e-11
NM_027827	Afmid	-1.33583	6.71659e-13	1.31801e-11
NM_001048192	Agbl5	-2.84499	8.70414e-27	4.19562e-25
NM_174849	Agbl5	-1.64703	0.000363857	0.00206589
NM_007425	Ager	-1.62019	5.98664e-12	1.0811e-10
NM_010472	Agfg1	0.595932	2.32873e-05	0.000170209
NM_178162	Agfg2	0.583876	0.0111321	0.0417543
NM_001081326	Agl	0.626361	1.76145e-05	0.000131979
NM_153403	Ago1	-0.382902	0.00751609	0.0298598
NM_153178	Ago2	0.667013	0.00173777	0.00829162
NM_153177	Ago4	-1.50336	2.5496e-05	0.000184417
NM_172666	Agps	0.536829	0.000185863	0.00113149
NM_007427	Agrp	-4.94485	0.0015896	0.00767999
NM_007428	Agt	-8.54367	7.55013e-282	3.54837e-278
NM_023328	Agtpbp1	-0.697332	0.000183008	0.00111664
NM_026375	Ahctf1	0.489526	0.000650308	0.00347404
NM_016661	Ahcy	0.409222	0.00370537	0.0161641
NM_146155	Ahdc1	-0.726844	0.00639195	0.0259418
NM_009643	Ahnak	0.59592	3.25601e-06	2.80521e-05
NM_172391	Ahsa2	0.824432	9.59512e-07	8.99644e-06
NM_133818	AI597479	0.537133	0.0022193	0.0102785
NR_027236	AI854703	-2.06263	0.00934432	0.0359011
NM_145144	Aif1l	-0.738871	6.8898e-08	7.55227e-07
NM_172393	Aim1	-2.4602	1.65849e-35	1.19456e-33
NM_027592	Ak6	1.07322	2.23829e-09	2.99485e-08
NM_031185	Akap12	-0.392723	0.00622548	0.0253867
NM_018747	Akap7	-0.481821	0.00417397	0.0179147
NM_019774	Akap8	-0.496677	0.000324968	0.00186879
NM_017476	Akap8l	-1.39932	3.00037e-21	1.05626e-19
NM_023423	Akirin1	1.04164	9.42746e-13	1.82332e-11
NM_001045514	Akna	1.12531	0.00360504	0.0157901
NM_021473	Akr1a1	0.350435	0.00767469	0.0303996
NM_009658	Akr1b3	0.425373	0.0104606	0.0395989
NM_009731	Akr1b7	-1.31492	0.00216139	0.01004
NM_013777	Akr1c12	-1.95062	6.11116e-09	7.64871e-08
NM_134072	Akr1c14	-2.53715	3.37405e-08	3.83952e-07
NM_018859	Akr1e1	-0.380958	0.0130891	0.0481153
NM_025337	Akr7a5	-0.70413	0.000357249	0.00203451
NM_011785	Akt3	0.372904	0.00971155	0.0371299
NM_008525	Alad	-0.917135	5.22699e-08	5.82812e-07
NM_019698	Aldh18a1	1.18232	0.000605321	0.00326058
NM_013467	Aldh1a1	-3.10398	6.55251e-24	2.69542e-22
NM_009022	Aldh1a2	0.563139	2.71394e-05	0.000195402
NM_053080	Aldh1a3	6.5294	2.81319e-170	5.87613e-167
NM_011921	Aldh1a7	-3.04461	9.55982e-05	0.000617578
NM_153543	Aldh1l2	3.64147	1.63945e-103	8.56111e-101
NM_009656	Aldh2	-0.368695	0.00612706	0.0250452
NM_026316	Aldh3b1	-1.22045	1.07896e-05	8.45496e-05
NM_134042	Aldh6a1	-1.41438	1.96807e-18	5.86336e-17
NM_138600	Aldh7a1	-1.73301	0.00503461	0.021131
NM_019993	Aldh9a1	-0.540818	0.000115197	0.000732113
NM_144903	Aldob	-12.8185	0.00587925	0.024153
NM_001033441	Alg10b	1.86762	2.59791e-27	1.28184e-25
NM_024178	Alg14	0.629599	0.000246027	0.00145579
NM_145939	Alg3	0.458853	0.00687485	0.0276509
NM_025442	Alg5	0.582898	0.000109482	0.00069934
NM_199035	Alg8	0.726931	0.00144067	0.00704005
NM_133981	Alg9	0.533104	0.00219557	0.0101837
NM_001102565	Alkbh1	0.680844	0.00205806	0.00962424
NM_025538	Alkbh7	-1.73047	0.000119337	0.000755612
NM_009661	Alox8	-1.95869	0.000894711	0.00463224
NM_011786	Aloxe3	-13.4481	0.000296181	0.00172049
NM_175370	Als2cr12	5.00791	4.70679e-06	3.94133e-05
NM_008537	Amacr	0.717485	0.000284768	0.00166131
NM_172935	Amdhd2	-1.07218	7.9228e-12	1.41848e-10
NM_011787	Amfr	0.69083	9.73554e-08	1.04232e-06
NM_177275	Amigo3	0.923047	0.00518057	0.021671
NM_019496	Ammecr1	2.33481	1.74552e-41	1.58521e-39
NM_153319	Amot	-3.2591	1.45109e-111	1.04919e-108
NM_001081395	Amotl1	1.57542	1.96829e-32	1.28034e-30
NM_019764	Amotl2	-0.958525	2.41222e-13	4.90241e-12
NM_181394	Anapc13	-0.830398	0.00411773	0.0177178
NM_027532	Anapc15	0.598361	0.00256921	0.0117658
NM_009640	Angpt1	1.28638	4.92406e-05	0.000337222
NM_007426	Angpt2	-1.09119	0.00839492	0.03281
NM_009641	Angpt4	0.765891	0.000581128	0.00314378
NM_011923	Angptl2	1.84341	2.86319e-40	2.43552e-38
NM_020581	Angptl4	0.85992	2.10486e-05	0.00015554
NM_145154	Angptl6	3.12052	0.000269312	0.00157769
NM_001039554	Angptl7	-3.20727	0.000997745	0.00509829
NM_175375	Ankhd1	-0.713361	1.62536e-07	1.69375e-06
NM_001003909	Ankib1	0.876611	3.39219e-09	4.41314e-08
NM_146033	Ankmy2	-0.553505	0.000214101	0.0012814
NM_013468	Ankrd1	2.21765	9.81948e-64	1.92288e-61
NM_001025572	Ankrd12	-0.79911	3.10073e-08	3.5392e-07
NM_001013806	Ankrd13c	0.967971	2.24007e-09	2.9951e-08
NM_026720	Ankrd13d	-1.63712	1.12529e-09	1.56351e-08
NM_177268	Ankrd16	-0.827104	5.85042e-06	4.80062e-05
NM_153502	Ankrd23	-0.734892	0.0066328	0.0267978
NM_027480	Ankrd24	-1.55941	1.13335e-13	2.3647e-12
NM_001190371	Ankrd29	-1.61783	1.01213e-09	1.41149e-08
NM_026153	Ankrd33b	-2.33174	0.000927566	0.00478259
NM_001081139	Ankrd35	-2.35421	2.53015e-06	2.22263e-05
NM_001039562	Ankrd37	1.25021	0.00375409	0.0163515
NM_027799	Ankrd40	-0.377456	0.00997273	0.037974
NM_001081433	Ankrd44	0.938082	9.72275e-09	1.1861e-07
NM_001167883	Ankrd50	0.862995	4.81446e-09	6.13606e-08
NM_172790	Ankrd52	0.462422	0.00307888	0.0137875
NM_181413	Anks1	-0.667632	0.000182321	0.00111353
NM_028301	Anks3	-0.504981	0.00333876	0.0147683
NM_001024136	Anks6	-2.0013	5.16201e-17	1.40435e-15
NM_026187	Ankzf1	-0.732277	3.61809e-05	0.000254457
NM_001128103	Ano3	1.64268	0.000168098	0.00103372
NM_175344	Ano6	-0.373382	0.00362145	0.0158472
NM_130889	Anp32b	0.396511	0.0128046	0.0471433
NM_008486	Anpep	-6.14007	6.34576e-33	4.21533e-31
NM_054041	Antxr1	-1.02413	2.42783e-14	5.45943e-13
NM_010730	Anxa1	0.646932	4.9124e-07	4.81733e-06
NM_013469	Anxa11	-0.617146	1.57221e-05	0.000119322
NM_027211	Anxa13	3.88386	4.38599e-20	1.444e-18
NM_007585	Anxa2	0.555788	1.26809e-05	9.77804e-05
NM_013470	Anxa3	0.776038	1.86904e-09	2.52596e-08
NM_013471	Anxa4	0.34228	0.0118356	0.0440675
NM_009673	Anxa5	0.84533	2.53243e-11	4.2697e-10
NM_013472	Anxa6	1.00018	2.71582e-11	4.55846e-10
NM_013473	Anxa8	1.05936	5.89644e-10	8.44871e-09
NM_007455	Ap1g2	-0.634242	0.00139849	0.00685713
NM_007456	Ap1m1	-0.612471	1.25583e-05	9.69942e-05
NM_026887	Ap1s2	1.6096	1.97321e-26	9.27359e-25
NM_183027	Ap1s3	-1.20409	2.3939e-06	2.10787e-05
NM_001077264	Ap2a1	1.21118	0.00724876	0.0289319
NM_007459	Ap2a2	0.468273	0.000449321	0.00249683
NM_009680	Ap3b1	0.36992	0.00707403	0.0283308
NM_018829	Ap3m1	0.814127	2.27836e-09	3.0398e-08
NM_177034	Apba1	-4.05941	8.77138e-43	8.49965e-41
NM_009685	Apbb1	-0.974453	1.93204e-10	2.94809e-09
NM_019456	Apbb1ip	1.14606	0.000890565	0.00461459
NM_146085	Apbb3	-2.28575	9.33086e-36	6.85199e-34
NM_007462	Apc	0.530476	0.000141657	0.000884132
NM_011789	Apc2	-1.53253	2.13232e-09	2.8653e-08
NM_133237	Apcdd1	1.03206	1.78262e-05	0.000133353
NM_029943	Apex2	0.503652	0.0106654	0.0402849
NM_177583	Aph1b	0.468804	0.0125025	0.0461577
NM_013912	Apln	-2.88776	0.00241615	0.0111272
NM_007467	Aplp1	1.12896	1.14856e-14	2.67556e-13
NM_144897	Apoa1bp	-0.484069	0.000549499	0.00299248
NM_001134391	Apobec1	5.23896	4.92657e-07	4.82815e-06
NM_138310	Apobr	2.31117	1.14897e-31	7.22394e-30
NM_007470	Apod	2.08446	0.00841286	0.0328664
NM_009696	Apoe	-1.07964	0.000302136	0.00174873
NM_013475	Apoh	-13.004	0.00277813	0.0126242
NM_001081970	Apol8	2.82036	1.07234e-24	4.6025e-23
NM_026511	Apopt1	-0.653078	0.00039646	0.00223079
NM_001163388	Apopt1	-3.69128	0.00313432	0.0140024
NM_145221	Appl1	0.548585	0.000161085	0.000993517
NM_145220	Appl2	-0.779836	2.32127e-07	2.35752e-06
NM_007472	Aqp1	-6.08854	1.36961e-58	2.16364e-56
NM_016689	Aqp3	-3.71557	0.00171235	0.00818886
NM_013476	Ar	-0.932778	0.00791543	0.0312282
NM_009703	Araf	-1.28036	7.91897e-18	2.26589e-16
NM_178407	Arap2	1.55487	1.3125e-18	3.96683e-17
NM_018790	Arc	1.80559	2.48188e-05	0.000180282
NM_145985	Arcn1	0.887175	1.19222e-11	2.08488e-10
NM_009704	Areg	5.59012	8.06833e-17	2.16372e-15
NM_178065	Arel1	0.73987	0.000152474	0.00094724
NM_007476	Arf1	0.791315	0.000268989	0.00157629
NM_007479	Arf4	1.18765	4.45285e-20	1.46345e-18
NM_007481	Arf6	-0.496649	0.000190128	0.00115335
NM_001081093	Arfip1	0.967657	5.39986e-12	9.79846e-11
NM_007482	Arg1	3.826	9.99201e-66	2.01978e-63
NM_030113	Arhgap10	-0.537331	0.000104932	0.000673016
NM_176837	Arhgap18	-2.80501	8.27786e-50	9.84908e-48
NM_175535	Arhgap20	-13.1665	0.00628984	0.0256157
NM_153800	Arhgap22	1.36389	3.73305e-06	3.17833e-05
NM_172964	Arhgap28	-2.50735	9.86876e-19	3.01663e-17
NM_172525	Arhgap29	-1.07691	1.64542e-14	3.74936e-13
NM_020260	Arhgap31	0.930902	4.37124e-07	4.31818e-06
NM_178252	Arhgap33	-0.661625	0.00884644	0.034246
NM_001081123	Arhgap36	-3.27831	0.00582078	0.0239547
NM_027823	Arhgap42	1.08954	1.68543e-13	3.4818e-12
NM_009706	Arhgap5	1.05303	2.21494e-12	4.16386e-11
NM_007486	Arhgdib	-4.27173	1.46512e-26	6.97286e-25
NM_008113	Arhgdig	1.90619	3.62962e-06	3.09869e-05
NM_027144	Arhgef12	-0.764621	9.13162e-09	1.11834e-07
NM_177566	Arhgef15	-2.45827	0.00121851	0.00608576
NM_001081116	Arhgef17	-0.886597	1.0446e-06	9.73594e-06
NM_172520	Arhgef19	1.065	4.84845e-05	0.000332893
NM_001198911	Arhgef2	4.15322	2.95043e-10	4.402e-09
NM_008487	Arhgef2	1.10998	0.0117424	0.0437639
NM_012026	Arhgef28	-1.67161	4.78353e-32	3.03803e-30
NM_183019	Arhgef4	-2.00918	1.65953e-10	2.55299e-09
NM_133674	Arhgef5	0.94199	5.71343e-11	9.23532e-10
NM_001085355	Arid1b	-1.4983	2.16368e-28	1.12673e-26
NM_175251	Arid2	-0.599646	1.15284e-05	8.98889e-05
NM_019689	Arid3b	-1.3726	9.05635e-06	7.19833e-05
NM_001081195	Arid4a	-0.469532	0.00104028	0.00528834
NM_023598	Arid5b	-1.17357	3.7055e-10	5.46779e-09
NM_019927	Arih1	0.507158	0.000156761	0.000971307
NM_025859	Arl1	0.86704	7.68534e-10	1.08385e-08
NM_172595	Arl15	-0.526082	0.00137041	0.0067335
NM_177305	Arl4c	0.899329	6.49385e-12	1.17157e-10
NM_029466	Arl5b	0.814084	0.00545863	0.0226928
NM_022992	Arl6ip5	-0.547615	6.66232e-05	0.000444604
NM_022989	Arl6ip6	0.565083	0.00644266	0.0261137
NM_026823	Arl8a	0.34615	0.0083071	0.0325073
NM_028840	Armc1	0.5994	0.000135344	0.000848394
NM_026034	Armc10	-0.515763	0.000292501	0.00169976
NM_028768	Armc8	-0.621879	0.00128418	0.00636976
NM_027870	Armcx3	0.515847	0.000158127	0.00097869
NM_001007578	Armcx6	-0.575781	0.00332834	0.0147292
NM_007488	Arnt2	-1.14801	4.20835e-14	9.14598e-13
NM_007489	Arntl	3.28918	1.51731e-14	3.47853e-13
NM_029711	Arpc2	0.432109	0.000693164	0.00367711
NM_026369	Arpc5	1.05342	7.10641e-14	1.50953e-12
NM_028809	Arpc5l	0.393651	0.0118996	0.0442524
NM_027420	Arpin	-1.16093	2.32096e-12	4.35881e-11
NM_001042591	Arrdc3	-0.874375	3.7332e-05	0.00026177
NM_001042592	Arrdc4	0.723125	0.000171798	0.00105371
NM_009713	Arsa	-0.50818	0.000988146	0.00505336
NM_173451	Arsj	-1.14986	5.85421e-06	4.80163e-05
NM_029847	Arsk	-0.920847	6.74156e-07	6.46275e-06
NM_033474	Arvcf	-1.40328	1.00128e-11	1.77241e-10
NM_029823	Arxes2	-2.33447	5.20999e-08	5.81262e-07
NM_019734	Asah1	0.783743	6.99105e-10	9.88899e-09
NM_001008232	Asap3	-0.796828	0.00018844	0.00114532
NM_023906	Asb3	0.479448	0.00636652	0.0258665
NM_029569	Asb5	2.14472	6.68021e-15	1.59367e-13
NM_029291	Ascc2	0.46274	0.00298727	0.0134445
NM_198007	Ascc3	1.06404	1.69685e-12	3.2352e-11
NM_183000	Asic3	-3.9049	1.28875e-18	3.91391e-17
NM_012055	Asns	2.3218	5.29e-63	9.94467e-61
NM_133728	Asnsd1	0.707972	6.05389e-07	5.85428e-06
NM_001177851	Asph	2.29201	0.0057206	0.0236044
NM_025610	Asrgl1	-0.871174	0.0038627	0.0167624
NM_007494	Ass1	2.06466	5.33234e-40	4.49518e-38
NM_001164828	Aste1	3.12734	0.0109283	0.0410801
NM_001039939	Asxl1	-0.449691	0.0011404	0.00574119
NM_026487	Atad1	0.555788	6.85033e-05	0.000455856
NM_001142744	Atat1	-1.51735	5.34019e-13	1.05231e-11
NM_007498	Atf3	1.07396	0.000270254	0.00158271
NM_009716	Atf4	1.46633	2.55153e-29	1.41493e-27
NM_001081304	Atf6	0.804499	2.70174e-08	3.10832e-07
NM_017406	Atf6b	-0.633955	0.00402275	0.0173568
NM_172599	Atg14	-0.682977	4.22438e-05	0.000293691
NM_001111111	Atg16l2	-1.44246	2.45375e-07	2.48803e-06
NM_026402	Atg3	0.424169	0.00394111	0.0170476
NM_153583	Atg4d	-0.830031	0.000157308	0.000974374
NM_053069	Atg5	0.482896	0.00156303	0.00757186
NM_001002897	Atg9b	1.01003	0.000712887	0.00376872
NM_026195	Atic	0.816262	4.98548e-06	4.14333e-05
NM_007881	Atn1	-0.577983	0.00463278	0.0196773
NM_153778	Atoh8	-5.01212	2.72961e-40	2.33245e-38
NM_015804	Atp11a	-0.409515	0.00175622	0.00836675
NM_001128096	Atp13a3	1.76588	0.000186308	0.00113383
NM_001128094	Atp13a3	1.54346	0.00430885	0.0184473
NM_009721	Atp1b1	-1.23456	4.54561e-18	1.31466e-16
NM_013415	Atp1b2	-3.67492	8.08548e-10	1.13687e-08
NM_026482	Atp2b1	-1.39259	8.59314e-26	3.91144e-24
NM_213616	Atp2b4	4.38032	3.26319e-41	2.90733e-39
NM_016774	Atp5b	0.388075	0.00208512	0.00974352
NM_001161419	Atp5g1	1.1204	3.08247e-10	4.58444e-09
NM_025504	Atp5sl	-0.60967	0.000606413	0.00326366
NM_018794	Atp6ap1	0.375593	0.00351299	0.0154501
NM_027439	Atp6ap2	0.784853	5.381e-09	6.79379e-08
NM_011596	Atp6v0a2	0.55972	0.000667541	0.003557
NM_080467	Atp6v0a4	-5.39562	0.000103155	0.000662751
NM_025272	Atp6v0e	0.579827	0.000210394	0.00126163
NM_133764	Atp6v0e2	-0.813194	0.00051202	0.00281036
NM_007508	Atp6v1a	0.582213	1.61816e-05	0.000122365
NM_023721	Atp6v1d	0.546788	4.5519e-05	0.000314716
NM_007510	Atp6v1e1	0.646829	7.28945e-07	6.95605e-06
NM_024173	Atp6v1g1	0.814603	4.28146e-10	6.28315e-09
NM_023179	Atp6v1g2	-2.24259	8.10847e-11	1.28743e-09
NM_133826	Atp6v1h	0.827923	5.38111e-09	6.79379e-08
NM_001081182	Atp8b2	0.521795	0.000355588	0.00202628
NM_007512	Atpif1	-0.577147	9.44209e-06	7.45806e-05
NM_027855	Atraid	-0.854196	7.87322e-06	6.3321e-05
NM_009730	Atrn	0.452246	0.00246703	0.0113393
NM_028139	Atxn7l1	-0.896015	3.19695e-06	2.75812e-05
NM_001033436	Atxn7l1	-1.02678	0.00177891	0.00845985
NM_175183	Atxn7l2	-1.26911	0.000166115	0.00102219
NM_001033220	AU021092	-1.07257	0.0089583	0.0346022
NM_025338	Aurkaip1	0.493115	0.000861528	0.0044783
NM_177047	Auts2	-1.16615	2.79068e-07	2.82054e-06
NM_009635	Avil	-2.54349	6.87151e-10	9.73456e-09
NR_040698	AW046200	-2.51271	6.40534e-09	8.00093e-08
NM_001033530	AW146154	-0.607841	0.00629977	0.0256452
NM_001033532	AW554918	-0.683179	0.00232565	0.010735
NM_009733	Axin1	-1.61313	0.00818849	0.0321301
NM_001190975	Axl	2.69603	5.39106e-05	0.000366799
NM_018745	Azin1	2.94215	1.25963e-09	1.73351e-08
NM_001102458	Azin1	2.39029	0.00321747	0.0143228
NM_172875	Azin2	0.475464	0.00689164	0.0276947
NR_028263	B130006D01Rik	-1.19147	0.00625848	0.0255047
NM_026592	B230118H07Rik	-0.629915	0.000498242	0.00274274
NM_020026	B3galnt1	-1.45068	0.00437403	0.0187093
NM_178640	B3galnt2	0.760941	5.38643e-07	5.24388e-06
NM_020283	B3galt1	-0.495542	0.00939594	0.0360846
NM_019420	B3galt4	-1.06191	0.00370503	0.0161641
NR_033214	B430212C06Rik	-2.88109	1.38603e-06	1.26609e-05
NM_008081	B4galnt2	-1.4937	0.000119867	0.000758459
NM_022305	B4galt1	1.65607	6.55411e-26	3.01249e-24
NM_019804	B4galt4	-0.910076	1.19616e-05	9.27667e-05
NM_146045	B4galt7	1.08785	1.49851e-08	1.79202e-07
NR_045448	B630019K06Rik	-0.9817	0.000235587	0.00140064
NR_027959	B830017H08Rik	-4.01278	0.00212748	0.0099119
NM_080640	Baalc	1.82414	3.34702e-09	4.35739e-08
NM_011792	Bace1	1.15948	0.00190967	0.00901101
NM_007520	Bach1	0.519157	0.00140853	0.00690095
NM_007522	Bad	-0.422125	0.012143	0.0450248
NM_145392	Bag2	0.649585	4.00063e-06	3.38926e-05
NM_198423	Bahcc1	-1.19357	5.62608e-15	1.34561e-13
NM_001045523	Bahd1	-0.679368	4.6882e-05	0.000322834
NM_001037755	Baiap2	-0.682873	0.000758832	0.00399252
NM_025833	Baiap2l1	0.380088	0.0112591	0.0421634
NM_177580	Baiap2l2	-2.04841	0.0111292	0.0417543
NM_007523	Bak1	0.397554	0.0029425	0.0132812
NM_007525	Bard1	1.52775	0.000380855	0.00215071
NM_027395	Basp1	1.11602	3.8269e-18	1.11365e-16
NM_007527	Bax	0.396991	0.00370846	0.0161715
NM_001001182	Baz2b	-0.450591	0.00133214	0.00656607
NM_028377	Bbof1	-4.02765	9.13968e-21	3.1584e-19
NM_001033128	Bbs1	-1.01598	3.23341e-05	0.000229464
NM_027914	Bbs10	-1.25436	1.75934e-06	1.58475e-05
NM_026116	Bbs2	-1.44692	1.1563e-16	3.04871e-15
NM_175325	Bbs4	-0.532734	0.00530834	0.0221316
NM_024473	BC005537	0.730934	3.09308e-07	3.10614e-06
NM_001166581	BC005561	-0.947469	1.88097e-09	2.53885e-08
NM_145590	BC017158	-0.543953	0.00617191	0.0251847
NR_033219	BC020402	-0.778173	0.0048227	0.0203826
NR_033629	BC021767	-2.24043	5.68145e-08	6.29749e-07
NM_145450	BC022687	-0.594926	0.00112365	0.00566923
NR_030677	BC025920	-1.20489	0.000421427	0.0023579
NM_153557	BC029214	-0.951305	6.75333e-06	5.47695e-05
NM_001164580	BC030336	0.450737	0.0100484	0.0382429
NM_001001181	BC031181	0.687591	2.14862e-07	2.19045e-06
NM_153161	BC037034	-0.614829	0.000274572	0.001606
NM_020486	Bcam	-3.7846	4.61645e-62	8.34467e-60
NM_013867	Bcar3	1.62879	8.82445e-19	2.71507e-17
NM_007532	Bcat1	2.95765	2.39151e-09	3.18174e-08
NM_025392	Bccip	0.41206	0.00988328	0.0376791
NM_007533	Bckdha	-0.83481	3.99303e-08	4.5057e-07
NM_199195	Bckdhb	-0.73348	0.000108576	0.000693784
NM_009740	Bcl10	0.557674	0.000779424	0.00408828
NM_177410	Bcl2	-2.77562	2.40194e-10	3.62392e-09
NM_009741	Bcl2	-0.778816	0.0017307	0.00826591
NM_009743	Bcl2l1	0.534298	5.51452e-05	0.000374116
NM_033601	Bcl3	-2.55936	4.2536e-23	1.67638e-21
NM_009746	Bcl7c	-0.726667	0.0125162	0.0461991
NM_029933	Bcl9	-0.658183	0.00353797	0.0155289
NM_001172055	Bdh2	-3.37775	7.68346e-08	8.37827e-07
NM_001163175	Begain	-3.36167	0.00404256	0.0174223
NM_177235	Bend6	2.6102	2.46084e-11	4.15645e-10
NM_009748	Bet1	0.801516	6.92347e-06	5.60768e-05
NM_018742	Bet1l	0.849459	9.01549e-08	9.71244e-07
NM_009750	Bex3	0.871262	2.06899e-05	0.000153129
NM_001110234	Bex3	0.951424	0.000299487	0.00173606
NM_007542	Bgn	2.97048	9.20156e-85	3.26377e-82
NM_011498	Bhlhe40	2.91457	2.40239e-49	2.82266e-47
NM_031397	Bicc1	-1.33449	2.68602e-23	1.06754e-21
NM_007544	Bid	0.888881	8.26148e-08	8.97731e-07
NM_144558	Bivm	0.432042	0.00546619	0.0227142
NM_016916	Blcap	0.687772	5.58398e-06	4.60409e-05
NM_008528	Blnk	-2.40187	9.22401e-19	2.83337e-17
NM_015740	Bloc1s1	-0.968746	8.84595e-12	1.57775e-10
NM_028607	Bloc1s2	0.498052	0.0103785	0.0393359
NM_139063	Bloc1s5	-0.704047	0.000274457	0.00160582
NM_026678	Blvra	0.547387	0.00556339	0.0230569
NM_144923	Blvrb	-1.5575	1.38373e-14	3.18783e-13
NM_138313	Bmf	-2.04967	9.232e-09	1.1299e-07
NM_009755	Bmp1	1.87785	1.97802e-29	1.11e-27
NR_033241	Bmp1	1.29342	0.000385901	0.00217593
NM_173404	Bmp3	-13.5327	0.00198206	0.00931287
NM_007554	Bmp4	-1.5798	1.85996e-09	2.5155e-08
NM_007556	Bmp6	-1.96807	9.19319e-18	2.61457e-16
NM_007561	Bmpr2	1.29298	8.78138e-08	9.48742e-07
NM_175312	Bmt2	0.766347	8.86364e-06	7.0575e-05
NM_172870	Bnc2	0.487886	0.00398266	0.0172115
NM_172149	Bnip1	-0.621841	0.00894357	0.0345734
NM_001008238	Bnip2	0.71747	0.000727665	0.00384252
NM_009760	Bnip3	0.612918	7.92122e-05	0.00051994
NM_001081422	Bod1l	-0.393818	0.00240816	0.0110931
NM_016778	Bok	1.47285	4.31566e-07	4.26552e-06
NM_175265	Bora	1.00666	0.000194826	0.00117804
NM_001145552	Borcs8	-0.584022	0.00013143	0.000826064
NM_026512	Bphl	-1.14574	1.25729e-09	1.73156e-08
NM_011794	Bpnt1	0.965449	2.83224e-09	3.72853e-08
NM_176850	Bptf	-0.448564	0.000550994	0.00299975
NM_139294	Braf	-0.702713	0.000858637	0.00446638
NM_020508	Brd4	-0.421086	0.00202483	0.00948686
NM_001024508	Brd9	-0.842555	2.48033e-08	2.8694e-07
NM_028193	Brf1	-0.696276	2.45031e-05	0.000178333
NM_019967	Brinp1	0.878803	3.26618e-06	2.81268e-05
NM_026396	Brix1	0.792716	1.04446e-08	1.26922e-07
NM_027861	Brox	0.364137	0.00815674	0.0320256
NM_001081315	Brpf3	-0.489978	0.000902552	0.0046677
NM_029426	Brsk2	-13.1135	0.00169477	0.00811927
NM_176928	Brwd1	1.05182	1.07171e-05	8.4051e-05
NM_001081477	Brwd3	0.662048	0.00244325	0.0112407
NM_009763	Bst1	-1.70769	4.49152e-07	4.42074e-06
NM_133700	Btbd10	0.790287	8.79334e-07	8.31034e-06
NM_145361	Btbd2	-0.90322	2.00291e-10	3.05128e-09
NM_172806	Btbd7	0.686112	0.000701065	0.00371353
NM_027060	Btbd9	-0.787046	0.00831786	0.0325359
NM_025295	Btd	-0.949272	1.46198e-07	1.53712e-06
NM_007570	Btg2	1.10801	2.06974e-15	5.11287e-14
NM_013483	Btn1a1	2.69858	0.000333162	0.00190863
NM_146000	Bud13	-0.615976	0.00151191	0.00735191
NM_001008705	Bud31	0.542352	0.000125867	0.000794554
NM_024285	Bves	-3.60866	5.89102e-22	2.16723e-20
NM_016859	Bysl	0.916922	1.75861e-07	1.82149e-06
NM_025824	Bzw1	1.00511	2.63351e-14	5.88673e-13
NR_027987	C030016D13Rik	-2.49273	0.00124416	0.00619246
NR_026848	C030034I22Rik	-0.948034	0.00473951	0.0200612
NM_178692	C130074G19Rik	0.396609	0.00736442	0.0293562
NR_040717	C130083M11Rik	0.864844	0.00271383	0.0123648
NM_052993	C1galt1	0.886173	0.000127326	0.000802416
NM_021550	C1galt1c1	1.00454	2.95015e-09	3.8756e-08
NM_007573	C1qbp	0.530404	0.00107953	0.00547747
NM_030888	C1qtnf3	5.56595	4.12071e-19	1.28894e-17
NM_001204134	C1qtnf3	4.65819	0.000104869	0.000672847
NM_023143	C1ra	-3.04413	3.39067e-28	1.74634e-26
NM_181344	C1rl	-5.53343	3.14211e-52	4.15976e-50
NM_173864	C1s2	-3.32849	0.00454869	0.0193639
NR_015479	C230091D08Rik	1.01548	2.19765e-09	2.94676e-08
NM_174847	C2cd2	-0.966869	6.59134e-07	6.32519e-06
NM_009778	C3	-8.96797	6.91588e-122	6.50058e-119
NM_029909	C330018D20Rik	0.541706	0.00572209	0.0236053
NM_011413	C4a	-2.17457	0.00353292	0.0155103
NM_009780	C4b	-4.98226	2.53333e-10	3.80992e-09
NM_007576	C4bp	-5.86807	1.15157e-101	5.41211e-99
NR_028304	C4bp-ps1	-4.1391	0.0115179	0.043064
NR_029450	C530005A16Rik	-1.62062	0.00283078	0.0128362
NM_016704	C6	-13.2162	0.00103179	0.0052551
NR_027923	C630043F03Rik	-1.32791	2.57048e-05	0.000185784
NR_040401	C920006O11Rik	-1.04293	0.00315741	0.0140896
NM_133781	Cab39	0.654049	1.1093e-06	1.03083e-05
NM_026908	Cab39l	0.439258	0.00413972	0.017788
NM_172549	Cabin1	-0.63041	5.48329e-06	4.52504e-05
NM_145851	Cables2	-0.630322	0.0011826	0.00592843
NM_023525	Cad	0.558244	0.000105333	0.000675359
NM_153112	Cadm4	1.12524	0.000359449	0.00204518
NM_026192	Calcoco1	-0.974166	2.74258e-13	5.53789e-12
NM_145575	Cald1	1.24747	7.25931e-23	2.80798e-21
NM_009790	Calm1	0.9414	1.94833e-13	4.00291e-12
NM_138304	Calml4	-4.53396	0.00894706	0.0345797
NM_007591	Calr	0.674527	8.55971e-08	9.28715e-07
NM_184053	Calu	2.00447	3.63935e-20	1.20451e-18
NM_007594	Calu	1.66468	4.70704e-19	1.46746e-17
NM_133926	Camk1	-0.728995	8.60557e-07	8.14582e-06
NM_177343	Camk1d	-0.745921	0.00840191	0.0328305
NM_001025438	Camk2d	0.992807	0.00170918	0.00817799
NM_025451	Camk2n1	1.63428	1.48602e-27	7.40998e-26
NM_028576	Camkmt	-0.768564	0.000654375	0.00349279
NM_027994	Cand1	0.499873	0.000173987	0.00106575
NM_025958	Cand2	-1.6375	1.47306e-18	4.43074e-17
NM_007597	Canx	1.77063	0.000244714	0.00144939
NM_007598	Cap1	0.731057	1.21756e-08	1.47101e-07
NM_001042534	Capg	1.13151	0.00041864	0.00234436
NM_001110807	Capn12	0.97552	0.00412274	0.0177307
NM_009794	Capn2	0.540773	2.34493e-05	0.000171193
NM_007603	Capn6	-4.53988	4.99638e-47	5.59089e-45
NM_027112	Capns2	1.35101	0.00404203	0.0174223
NM_181541	Caprin2	-1.28922	1.67164e-10	2.56937e-09
NM_178278	Caps2	-2.42448	0.00801193	0.0315427
NM_009797	Capza1	0.782181	2.20944e-09	2.96046e-08
NM_007604	Capza2	0.600767	1.39246e-05	0.00010654
NM_009798	Capzb	0.546055	0.000508933	0.00279504
NM_009800	Car11	-1.88672	2.06054e-05	0.000152565
NM_178396	Car12	-2.6397	7.80154e-05	0.000512801
NM_007592	Car8	3.00689	0.000464043	0.00257332
NM_130859	Card10	-0.951817	0.00585291	0.0240605
NM_026738	Card19	-0.961002	0.00758192	0.0300892
NM_025821	Carhsp1	0.818504	5.77998e-10	8.30082e-09
NM_001024645	Carmil3	-2.28734	1.2611e-08	1.52068e-07
NR_045402	Carmn	-0.67196	0.00132408	0.00653939
NM_013742	Cars	1.53893	1.25652e-27	6.34984e-26
NM_024248	Cars2	-0.57676	0.00913484	0.0352041
NM_138660	Casc3	-0.519485	0.000481879	0.00266515
NM_145398	Casd1	0.576842	0.00019926	0.00120292
NM_009806	Cask	0.480628	0.0025241	0.0115733
NM_080643	Caskin2	-1.13808	1.98834e-11	3.40723e-10
NM_009808	Casp12	0.600838	9.08765e-06	7.21448e-05
NM_009810	Casp3	1.01368	2.97077e-10	4.42883e-09
NM_015733	Casp9	-0.599718	0.00183917	0.00871772
NM_009817	Cast	1.36515	3.38448e-23	1.33947e-21
NM_001159344	Casz1	-2.59813	0.0118713	0.0441917
NM_007616	Cav1	0.988563	0.0122621	0.0454126
NM_016900	Cav2	0.804755	2.58037e-05	0.000186356
NM_001161458	Cbfb	1.86905	5.82123e-08	6.43346e-07
NM_007619	Cbl	0.922295	0.00196539	0.00923917
NM_019820	Cbln3	-2.15173	6.98099e-05	0.000463403
NM_007620	Cbr1	-0.722639	2.29588e-06	2.02631e-05
NM_007621	Cbr2	-1.4006	1.1134e-16	2.93999e-15
NM_173047	Cbr3	-1.90035	0.00602312	0.0246739
NM_178224	Cbs	-3.39806	2.22578e-05	0.000163703
NM_146097	Cbwd1	2.02733	4.92857e-07	4.82815e-06
NM_007623	Cbx2	-1.01877	8.47592e-07	8.02715e-06
NM_028763	Cbx6	-1.41748	9.94536e-27	4.78166e-25
NM_144811	Cbx7	-2.32898	1.94692e-14	4.40436e-13
NM_145970	Cc2d1a	-0.784947	0.000110185	0.000702396
NM_177045	Cc2d1b	-0.521607	0.000461419	0.00256027
NM_172274	Cc2d2a	-1.01122	9.9367e-10	1.38679e-08
NM_146055	Ccar2	-0.671873	6.68164e-06	5.42115e-05
NM_178793	Ccbe1	3.711	4.28178e-135	4.7349e-132
NM_001033533	Ccdc102a	-0.736609	0.00324233	0.014413
NM_001160399	Ccdc112	1.00243	1.01736e-08	1.23788e-07
NM_145574	Ccdc136	-1.41232	0.00125949	0.00625717
NM_001001178	Ccdc148	-2.03587	8.06568e-15	1.90486e-13
NM_001034059	Ccdc160	-4.57362	0.000266486	0.0015621
NM_001163741	Ccdc167	-0.566793	0.00807834	0.0317509
NM_001081012	Ccdc171	-1.18213	0.000272126	0.00159268
NM_001077684	Ccdc173	-1.36327	5.30152e-06	4.38273e-05
NM_027616	Ccdc178	-7.70874	1.94901e-41	1.75308e-39
NM_029115	Ccdc181	-1.10697	1.56831e-10	2.41463e-09
NM_177716	Ccdc184	-3.44269	1.60144e-06	1.45017e-05
NM_001033040	Ccdc189	-1.09312	0.00043932	0.00244705
NM_027801	Ccdc191	-0.901264	9.33438e-06	7.3885e-05
NM_138603	Ccdc22	-0.622216	0.000200471	0.00120877
NM_001034876	Ccdc24	-1.51035	7.30058e-11	1.16605e-09
NM_025455	Ccdc28b	-0.768106	0.0034917	0.0153655
NM_028804	Ccdc3	-13.7869	3.19278e-05	0.000227181
NM_029286	Ccdc30	-1.59626	1.71205e-05	0.000128534
NM_026613	Ccdc34	-1.02479	3.63338e-11	5.99157e-10
NM_026222	Ccdc39	-1.29094	0.000142206	0.000886969
NM_026009	Ccdc47	0.59918	2.50598e-05	0.000181751
NM_027745	Ccdc57	-1.92633	2.46157e-15	6.03725e-14
NM_001111121	Ccdc6	0.637461	3.6408e-05	0.000255585
NM_001134767	Ccdc62	-1.1623	2.78019e-05	0.000200018
NM_177471	Ccdc69	-2.30334	0.000363354	0.00206365
NM_026439	Ccdc80	0.714944	3.9839e-08	4.4981e-07
NM_025534	Ccdc82	-0.622883	5.64293e-06	4.64658e-05
NM_026681	Ccdc88c	-2.362	1.11073e-06	1.03165e-05
NM_172297	Ccdc9	-1.04167	0.00256146	0.0117389
NM_146248	Cchcr1	-1.10626	2.66737e-10	3.99553e-09
NM_011332	Ccl17	2.63843	0.00654351	0.0264597
NM_011333	Ccl2	-2.24313	2.16233e-19	6.85492e-18
NM_013653	Ccl5	1.59915	0.0013646	0.0067102
NM_013654	Ccl7	-1.45532	7.43275e-06	5.99949e-05
NM_146014	Ccm2	0.926991	0.000558086	0.0030366
NM_009828	Ccna2	-0.869848	0.000476672	0.00263868
NM_016746	Ccnc	0.742951	4.83551e-05	0.000332247
NM_007631	Ccnd1	1.54415	2.5911e-25	1.15427e-23
NM_009829	Ccnd2	0.707172	3.59438e-05	0.000252884
NM_009831	Ccng1	1.27956	8.31705e-24	3.4138e-22
NM_007635	Ccng2	0.49183	0.000693212	0.00367711
NM_017367	Ccni	0.570265	0.000172372	0.00105689
NM_207678	Ccnl2	-0.424115	0.00349174	0.0153655
NM_009833	Ccnt1	-0.653044	0.00472309	0.0200111
NM_026484	Ccny	0.462906	0.00105245	0.00534587
NM_001097644	Ccnyl1	0.669687	1.01017e-05	7.9424e-05
NM_001198789	Ccpg1os	-0.741156	0.000401711	0.00225831
NM_007636	Cct2	0.589606	4.12314e-06	3.48364e-05
NM_007637	Cct5	0.398349	0.0019214	0.00905044
NM_009838	Cct6a	0.648996	4.41742e-07	4.35693e-06
NM_007638	Cct7	0.470608	0.00028179	0.00164617
NM_009840	Cct8	0.571939	0.00012078	0.000763722
NM_177682	Ccz1	0.532706	0.000135124	0.000847297
NM_009841	Cd14	-3.65237	2.06845e-42	1.98392e-40
NM_001111049	Cd151	1.03816	2.60937e-07	2.64155e-06
NM_009842	Cd151	1.02074	1.43058e-06	1.30424e-05
NM_007639	Cd1d1	-1.06957	1.4992e-05	0.000114195
NM_010818	Cd200	5.02144	4.73928e-06	3.96501e-05
NM_054042	Cd248	0.520976	0.000510946	0.00280528
NM_021893	Cd274	-1.0333	0.00331729	0.0146906
NM_133983	Cd276	0.881893	1.62251e-08	1.93081e-07
NM_170758	Cd300a	-1.79567	5.48485e-10	7.90112e-09
NM_145822	Cd3eap	0.525548	0.00059661	0.00321643
NM_001039151	Cd44	2.82699	2.51357e-06	2.2091e-05
NM_008339	Cd79b	-13.2141	0.00103729	0.0052774
NM_009855	Cd80	1.35985	5.66982e-05	0.00038313
NM_007657	Cd9	1.10005	2.70688e-13	5.48348e-12
NM_028176	Cda	2.87195	1.41328e-28	7.44207e-27
NM_027986	Cdadc1	-0.764755	0.00016201	0.000998239
NM_026891	Cdan1	-0.718477	2.96697e-05	0.000212561
NM_027276	Cdc16	0.606861	6.11921e-06	4.99883e-05
NM_145436	Cdc27	0.923254	7.18037e-11	1.1488e-09
NM_177613	Cdc34	0.683723	3.31399e-06	2.84994e-05
NM_025950	Cdc37l1	0.506036	0.00354687	0.0155571
NM_009861	Cdc42	0.554665	1.699e-05	0.000127656
NM_001033285	Cdc42bpa	0.892114	1.32483e-11	2.31034e-10
NM_026772	Cdc42ep2	-2.06833	2.39738e-33	1.60959e-31
NM_026514	Cdc42ep3	-0.783626	3.95536e-08	4.46855e-07
NM_178626	Cdc42se2	0.452789	0.00168447	0.00808229
NM_145991	Cdc73	0.966851	1.13628e-08	1.37546e-07
NM_013538	Cdca3	-0.933275	0.0102167	0.0388006
NM_009865	Cdh10	5.13083	8.45599e-83	2.69431e-80
NM_009866	Cdh11	1.61683	1.84792e-26	8.72841e-25
NM_019707	Cdh13	-0.923499	0.0102611	0.0389616
NM_007663	Cdh16	-4.4407	1.80283e-75	4.77343e-73
NM_001081299	Cdh18	0.940033	0.000215986	0.00129063
NM_007664	Cdh2	-0.955499	6.94866e-14	1.47936e-12
NM_023370	Cdh23	4.22466	1.24222e-16	3.27065e-15
NM_001037809	Cdh3	-1.53232	0.00273532	0.0124537
NM_027118	Cdk13	1.23236	0.00615865	0.0251415
NM_146239	Cdk17	1.01859	1.8127e-11	3.12061e-10
NM_008795	Cdk18	0.779997	1.59097e-07	1.66067e-06
NM_016756	Cdk2	3.45741	0.00183454	0.00869798
NM_053180	Cdk20	-1.10379	1.62496e-06	1.46863e-05
NM_007669	Cdkn1a	1.85968	8.88231e-06	7.06937e-05
NM_001111099	Cdkn1a	1.93929	0.00042086	0.00235609
NM_009877	Cdkn2a	1.30612	5.93031e-06	4.8598e-05
NM_007670	Cdkn2b	2.56594	2.70571e-18	7.99757e-17
NM_007671	Cdkn2c	-1.10172	9.28393e-07	8.72207e-06
NM_033037	Cdo1	-1.21673	0.00451385	0.0192461
NM_007672	Cdr2	1.80759	2.54694e-32	1.64536e-30
NM_001080929	Cdr2l	1.28328	3.36623e-18	9.84164e-17
NM_173370	Cds1	-0.693813	0.000831287	0.00433973
NM_138651	Cds2	-0.384974	0.00575196	0.023713
NM_001008424	Cdsn	-2.30621	4.96027e-09	6.30054e-08
NM_029441	Cdyl2	0.846273	2.83005e-05	0.000203216
NM_009884	Cebpg	1.08937	2.60109e-12	4.85099e-11
NM_009886	Celsr1	-2.055	3.71677e-16	9.59774e-15
NM_080437	Celsr3	-3.2797	0.00788374	0.0311293
NM_007683	Cenpc1	0.395387	0.0122068	0.0452336
NM_028131	Cenpn	-0.792774	0.0124699	0.0460649
NM_029606	Cep112	-1.27773	0.000199355	0.00120311
NM_001045524	Cep126	1.12104	0.000185684	0.00113077
NM_181815	Cep128	-1.18552	3.88523e-05	0.00027172
NM_009734	Cep131	-1.03733	0.00132083	0.00652859
NM_001099637	Cep170	1.18602	9.3134e-18	2.64475e-16
NM_001081122	Cep63	-0.682979	0.000416866	0.00233512
NM_172260	Cep68	-0.414789	0.0119017	0.0442524
NM_001081073	Cep76	0.986633	3.19892e-06	2.75855e-05
NM_029852	Cep83	0.662637	5.89994e-05	0.000396969
NM_028120	Cep89	-0.907172	2.70055e-06	2.36019e-05
NM_028815	Cep97	-1.05538	1.68436e-08	1.99397e-07
NM_145475	Cerk	-1.50613	1.74841e-12	3.32003e-11
NM_026058	Cers4	-0.548406	0.000244674	0.00144939
NM_172856	Cers6	0.54007	0.0071662	0.0286511
NM_001081275	Cfap126	-1.12136	0.00114066	0.00574119
NM_008187	Cfap20	-0.367853	0.00851206	0.0331781
NM_025740	Cfap36	0.51196	0.000210682	0.00126295
NM_172447	Cfap69	-2.03381	3.34718e-31	2.08356e-29
NM_009888	Cfh	-4.63188	6.24018e-70	1.46637e-67
NM_007687	Cfl1	0.823231	6.16437e-11	9.9386e-10
NM_007688	Cfl2	1.17514	3.25081e-17	8.93449e-16
NM_008823	Cfp	-0.75701	0.00032842	0.00188518
NM_021050	Cftr	-3.06048	1.3114e-06	1.20259e-05
NM_178647	Cggbp1	0.640229	3.3216e-06	2.85518e-05
NM_026929	Chac1	3.16765	2.42562e-51	3.06035e-49
NM_028083	Chaf1b	-0.807142	0.000969491	0.00497148
NM_175329	Chchd10	-1.22031	0.00993236	0.0378279
NM_001081345	Chd2	-0.468088	0.00109085	0.00552745
NR_027827	Chd3os	-1.45535	0.00302321	0.013577
NM_145979	Chd4	-0.33587	0.00918523	0.0353693
NM_173368	Chd6	-0.860398	7.74245e-08	8.43281e-07
NM_201637	Chd8	-0.526179	0.00110082	0.00557013
NM_177224	Chd9	-0.363798	0.0103897	0.0393622
NM_172717	Chfr	0.386562	0.00984969	0.0375815
NM_009767	Chic1	-0.819729	4.82028e-05	0.000331321
NM_028850	Chic2	0.834037	2.08542e-06	1.85186e-05
NM_001142681	Chid1	0.654268	0.00388843	0.0168469
NM_013490	Chka	-0.600708	3.57459e-05	0.00025168
NM_018818	Chm	0.713581	4.85272e-06	4.04551e-05
NM_021350	Chml	1.164	4.45672e-10	6.49473e-09
NM_024190	Chmp1b	0.436635	0.00239748	0.0110466
NM_026885	Chmp2a	-0.358121	0.00604246	0.0247478
NM_026879	Chmp2b	0.370479	0.00946278	0.0363191
NM_025783	Chmp3	0.444377	0.00101647	0.00518833
NM_029814	Chmp5	0.794299	1.52406e-08	1.82026e-07
NR_040623	Chn1os3	-1.66388	0.00635292	0.025828
NM_025844	Chordc1	0.428457	0.00569001	0.0234885
NM_019769	Chp1	0.492982	0.000236767	0.0014072
NM_144807	Chpt1	-0.999338	1.45281e-08	1.74005e-07
NM_009893	Chrd	-1.75563	0.000205743	0.00123689
NM_031258	Chrdl1	-5.85913	8.3925e-11	1.32804e-09
NM_009601	Chrnb1	0.703765	0.000313442	0.00181081
NM_023850	Chst1	-1.58486	4.07913e-10	6.00029e-09
NM_021439	Chst11	2.09025	9.28492e-42	8.51449e-40
NM_021528	Chst12	1.01333	5.82637e-07	5.65461e-06
NM_029935	Chst15	-0.906137	0.00020927	0.00125649
NM_018763	Chst2	0.609328	0.000584971	0.00316184
NM_016803	Chst3	13.3825	0.000392257	0.00220978
NM_001081163	Chsy1	1.48968	1.31829e-25	5.94306e-24
NM_134141	Ciapin1	0.503545	0.000600444	0.00323616
NM_001033302	Ciart	1.94037	2.38793e-11	4.0442e-10
NM_011870	Cib1	0.544762	0.00855864	0.0333321
NM_025854	Cir1	-0.685548	2.63675e-06	2.31087e-05
NM_007705	Cirbp	-2.15389	9.88197e-11	1.55068e-09
NM_001085500	Cisd3	0.546258	0.00174715	0.00832985
NM_009895	Cish	-1.96647	7.37089e-21	2.56602e-19
NM_007708	Cit	2.17854	0.00380127	0.0165302
NM_010828	Cited2	-1.98255	1.99008e-11	3.40723e-10
NM_001004140	Ckap2	0.964496	3.81793e-07	3.80155e-06
NM_175451	Ckap4	1.0344	1.60231e-15	3.99493e-14
NM_029295	Cklf	0.874861	0.0105751	0.0399923
NM_016904	Cks1b	1.14917	4.83656e-11	7.88573e-10
NM_025415	Cks2	1.25275	2.19507e-07	2.23417e-06
NM_030601	Clca3a2	-2.22523	1.33814e-05	0.000102593
NM_139148	Clca3b	1.27932	0.00510604	0.0213926
NM_009900	Clcn2	-1.72186	1.38904e-14	3.19614e-13
NM_016674	Cldn1	-1.33732	5.85972e-24	2.41572e-22
NM_021719	Cldn15	-2.00199	0.00284599	0.0128951
NM_153105	Cldn19	-2.7013	0.000381354	0.00215288
NM_016675	Cldn2	-5.8495	4.33471e-190	1.16412e-186
NM_028426	Cldn34c1	0.946552	0.00067978	0.00361198
NM_009903	Cldn4	4.62703	1.48965e-26	7.07171e-25
NM_053109	Clec2d	-3.7202	2.71169e-72	6.7075e-70
NM_033444	Clic1	0.428555	0.000731239	0.00386031
NM_013885	Clic4	0.991769	7.14546e-14	1.5144e-12
NM_172621	Clic5	-4.70087	7.21074e-09	8.95934e-08
NM_001045520	Clint1	1.05049	2.32776e-14	5.24066e-13
NM_001081114	Clip3	-0.723767	2.83205e-08	3.25227e-07
NM_030179	Clip4	-4.14958	2.30415e-84	8.02142e-82
NR_027854	Clk1	-0.849081	4.46612e-07	4.39862e-06
NM_007714	Clk4	-0.565603	7.837e-05	0.000514772
NM_001040682	Clmn	-2.42762	7.2833e-11	1.16428e-09
NM_053155	Clmn	-2.68583	9.29069e-07	8.72406e-06
NM_133733	Clmp	-2.83806	4.13879e-08	4.66178e-07
NM_001033175	Cln6	-1.28962	1.2415e-13	2.5846e-12
NM_012000	Cln8	0.713814	7.51912e-06	6.06401e-05
NM_146047	Clptm1l	0.586026	1.56976e-05	0.000119184
NM_175554	Clspn	-1.63382	0.00063186	0.00338061
NM_023051	Clstn1	-0.6814	8.63241e-05	0.000561719
NM_022319	Clstn2	-0.913246	5.50442e-09	6.93549e-08
NM_001003908	Cltc	0.785325	8.83778e-10	1.23709e-08
NM_013492	Clu	-6.5687	0	0
NM_029738	Cluap1	-0.477754	0.0130332	0.0479287
NM_029556	Clybl	-0.629199	0.00109377	0.00553929
NM_009908	Cmas	0.979575	1.49781e-09	2.04781e-08
NM_010839	Cmc4	-0.920715	2.42176e-05	0.00017646
NM_008153	Cmklr1	2.23469	1.12773e-09	1.56575e-08
NM_025647	Cmpk1	0.925033	2.53776e-10	3.81353e-09
NM_024217	Cmtm3	-0.445653	0.00060119	0.00323926
NM_026036	Cmtm6	0.439629	0.00640729	0.0259928
NM_146215	Cmtr2	0.931621	7.65611e-05	0.000503947
NM_001109746	Cnbp	1.0052	0.000763337	0.00401286
NM_013493	Cnbp	0.832388	0.0029491	0.0132982
NM_023149	Cndp2	0.704604	4.61024e-07	4.53047e-06
NM_009919	Cnih1	0.82041	3.2245e-10	4.78055e-09
NM_009920	Cnih2	-1.49216	0.000388414	0.00218944
NM_001081047	Cnksr1	-2.74164	4.44973e-12	8.14513e-11
NM_172546	Cnksr3	-1.61153	4.84556e-25	2.11841e-23
NM_009922	Cnn1	3.20512	9.76165e-112	7.34037e-109
NM_007725	Cnn2	0.919167	3.66652e-13	7.32487e-12
NM_028044	Cnn3	1.43801	4.76136e-29	2.602e-27
NM_033570	Cnnm4	2.88628	5.99596e-39	4.92219e-37
NM_011135	Cnot7	0.657382	7.87513e-06	6.3321e-05
NM_026977	Cnppd1	-0.805414	1.6761e-08	1.9867e-07
NM_019953	Cnpy2	-0.706836	1.71593e-07	1.78023e-06
NM_028065	Cnpy3	-0.620449	2.57262e-05	0.000185867
NM_026562	Cntd1	-2.45295	0.00909715	0.0350661
NM_170786	Cntf	-2.76742	1.32201e-07	1.39935e-06
NM_175275	Cntln	-0.680233	5.8187e-05	0.000391923
NM_026618	Coa3	-0.645574	0.00644023	0.0261095
NM_198006	Coa5	0.391453	0.00455773	0.019398
NM_027250	Coa7	-0.591588	0.0075047	0.0298391
NM_172496	Cobl	-2.96511	4.22108e-79	1.2208e-76
NM_133973	Cog4	-0.345047	0.00887803	0.0343553
NM_001163126	Cog5	1.08221	1.79596e-05	0.000134297
NM_026225	Cog6	0.754805	2.99965e-06	2.59864e-05
NM_007729	Col11a1	0.999506	1.08963e-14	2.54458e-13
NM_007742	Col1a1	1.97016	9.24787e-53	1.25072e-50
NM_025685	Col27a1	2.56213	1.39396e-27	6.96942e-26
NM_009931	Col4a1	-1.11133	1.02544e-18	3.12943e-17
NM_009932	Col4a2	-1.56723	1.64569e-34	1.16306e-32
NM_007734	Col4a3	3.90003	1.11886e-101	5.3932e-99
NM_007735	Col4a4	3.05834	9.02794e-81	2.69391e-78
NM_053185	Col4a6	-2.68574	1.92953e-64	3.81824e-62
NM_015734	Col5a1	1.55867	8.19575e-34	5.62306e-32
NM_007737	Col5a2	2.03713	2.38009e-46	2.63196e-44
NM_016919	Col5a3	4.39304	3.95175e-140	5.30635e-137
NM_009933	Col6a1	-1.54211	1.0079e-31	6.35825e-30
NM_146007	Col6a2	-2.96711	2.05097e-63	3.9343e-61
NM_007738	Col7a1	3.19388	3.214e-14	7.07473e-13
NM_007739	Col8a1	1.88781	9.23768e-46	1.00381e-43
NM_199473	Col8a2	4.11459	1.44074e-36	1.08773e-34
NM_009936	Col9a3	1.54129	0.00145228	0.00708393
NM_130449	Colec12	-1.64813	2.35889e-28	1.225e-26
NM_146211	Colgalt1	0.566482	1.24939e-05	9.65367e-05
NM_144514	Commd1	-0.428692	0.00790351	0.0312008
NM_026965	Comtd1	-0.72629	0.000353025	0.0020129
NM_033370	Copb1	0.749034	1.4532e-08	1.74005e-07
NM_015827	Copb2	0.767179	2.28472e-09	3.04613e-08
NM_017477	Copg1	0.606824	3.20569e-06	2.76313e-05
NM_013715	Cops5	0.451206	0.00296568	0.0133633
NM_133805	Cops8	0.438494	0.00178928	0.00850483
NM_001081040	Coq10a	-0.470715	0.00679736	0.0273861
NM_001039710	Coq10b	2.43089	4.46671e-07	4.39862e-06
NM_172687	Coq3	0.794565	1.17818e-05	9.1599e-05
NM_172582	Coq6	-1.2835	1.44772e-14	3.3271e-13
NM_011779	Coro1c	1.08949	3.22879e-13	6.49177e-12
NM_030205	Coro7	-0.838466	1.11321e-05	8.69796e-05
NM_028071	Cotl1	2.87213	2.67686e-08	3.08158e-07
NM_199008	Cox11	0.578649	0.00397983	0.0172032
NM_001163456	Cox18	2.78861	0.000587427	0.00317329
NM_197980	Cox19	-0.448767	0.00612935	0.025049
NM_025511	Cox20	-0.474943	0.000921144	0.00475338
NM_007747	Cox5a	0.491445	0.00199927	0.00938433
NM_009187	Cox7a2l	-0.491567	0.00060914	0.00327552
NM_007752	Cp	-2.31095	3.96668e-28	2.03742e-26
NM_177834	Cpa6	-1.95238	4.10435e-10	6.03266e-09
NM_007754	Cpd	-0.543797	8.1379e-05	0.00053249
NM_013494	Cpe	-1.47823	2.6639e-31	1.66374e-29
NM_001081351	Cped1	-2.9368	8.88873e-09	1.09287e-07
NM_027468	Cpm	2.04338	1.50735e-21	5.40776e-20
NM_153507	Cpne2	-1.04521	5.08866e-10	7.35859e-09
NM_028719	Cpne4	0.848161	0.000467414	0.00259048
NM_025815	Cpne8	1.99851	1.4846e-40	1.29809e-38
NM_001033851	Cpne8	0.522346	0.000168695	0.00103622
NM_007757	Cpox	0.627108	0.00108768	0.00551288
NM_146067	Cpped1	0.421555	0.00345619	0.015234
NM_016856	Cpsf2	0.533101	0.000223402	0.00133241
NM_013495	Cpt1a	-0.888766	1.80407e-10	2.76179e-09
NM_024472	Cptp	0.862595	1.77892e-05	0.000133128
NM_019696	Cpxm1	-2.17046	5.52676e-13	1.08793e-11
NM_013499	Cr1l	0.621957	3.92567e-05	0.000274243
NM_007759	Crabp2	3.73331	1.7319e-36	1.30232e-34
NM_020608	Cramp1l	-0.606955	0.000226221	0.00134751
NM_007760	Crat	-0.736037	3.06106e-06	2.64939e-05
NM_177638	Crb3	-3.23296	1.98001e-17	5.4578e-16
NM_013497	Creb3	0.585852	1.6869e-05	0.000127001
NM_011957	Creb3l1	2.13063	4.01111e-50	4.83365e-48
NM_178661	Creb3l2	0.837388	4.77436e-08	5.34882e-07
NM_172728	Creb5	1.03016	0.0103275	0.039182
NM_001025432	Crebbp	-0.844259	1.49545e-08	1.78949e-07
NM_177687	Crebl2	-1.20968	3.7267e-06	3.17437e-05
NM_029870	Crebrf	-1.27917	1.96123e-18	5.85544e-17
NM_145151	Crebzf	-0.459645	0.00294346	0.0132823
NM_011804	Creg1	-0.506797	0.00437102	0.0187007
NM_015800	Crim1	0.445604	0.000627082	0.00335951
NM_030209	Crispld2	4.47562	5.12108e-105	2.91731e-102
NM_133656	Crk	0.99118	1.83471e-12	3.47338e-11
NM_007764	Crkl	0.561647	0.000827944	0.00432348
NM_018827	Crlf1	1.8237	1.07309e-06	9.98665e-06
NM_018776	Crlf3	0.536734	0.00403304	0.0173932
NR_033641	Crnde	-1.41099	1.75571e-08	2.07582e-07
NM_001004062	Crtc1	-1.03119	6.08647e-06	4.97909e-05
NM_028881	Crtc2	-0.665765	2.3314e-05	0.000170338
NM_173863	Crtc3	-0.982136	2.01272e-10	3.06373e-09
NM_007771	Cry1	0.635427	0.00881136	0.0341324
NM_009964	Cryab	-2.69556	6.25065e-89	2.35012e-86
NM_009968	Cryz	-1.35523	1.27033e-08	1.53083e-07
NM_026444	Cs	0.589044	4.94806e-06	4.11586e-05
NM_144942	Csad	-0.892539	2.40231e-09	3.19384e-08
NM_145473	Csdc2	0.917261	1.06665e-11	1.87577e-10
NM_001161854	Csde1	1.09656	0.00646897	0.0261865
NM_023565	Cse1l	0.776614	8.72751e-08	9.44348e-07
NM_001113530	Csf1	-0.962445	0.00626949	0.025544
NM_001037859	Csf1r	-4.14407	6.02462e-53	8.20702e-51
NM_009970	Csf2ra	-1.32191	1.18611e-06	1.09463e-05
NM_172753	Csgalnact1	2.61308	9.70789e-51	1.18506e-48
NM_030165	Csgalnact2	0.655596	0.000579358	0.00313781
NM_146087	Csnk1a1	0.71486	1.14177e-07	1.21267e-06
NM_027874	Csnk1d	0.756779	0.00183006	0.0086833
NM_173185	Csnk1g1	0.581951	3.74087e-05	0.00026221
NM_152809	Csnk1g3	0.448219	0.00113781	0.00573297
NM_007788	Csnk2a1	0.387089	0.0105945	0.0400574
NM_139001	Cspg4	3.96468	3.53524e-26	1.64096e-24
NM_026493	Cspp1	-0.910821	2.6915e-10	4.02526e-09
NM_153287	Csrnp1	1.74848	2.37141e-12	4.44911e-11
NM_007791	Csrp1	1.52823	1.32561e-32	8.65284e-31
NM_007792	Csrp2	1.99843	6.92794e-05	0.000460532
NM_009976	Cst3	-1.25129	1.44112e-07	1.51858e-06
NM_030137	Cstad	-2.21429	1.23654e-05	9.56618e-05
NM_007793	Cstb	0.492889	0.000189565	0.0011503
NM_133196	Cstf2	0.539823	0.000456912	0.00253676
NM_001081387	Ctcfl	-1.37538	0.00593653	0.0243723
NM_153088	Ctdsp1	-1.31493	1.1357e-20	3.90312e-19
NM_133710	Ctdspl	-2.38396	6.24116e-52	8.09155e-50
NM_007795	Ctf1	-0.852537	0.00343093	0.0151404
NM_010217	Ctgf	4.56185	7.96426e-93	3.25479e-90
NM_145953	Cth	3.38276	3.20122e-29	1.7648e-27
NM_007796	Ctla2a	2.71819	6.96921e-75	1.81964e-72
NM_001145799	Ctla2a	4.1128	9.52791e-57	1.43292e-54
NM_001145801	Ctla2b	4.09887	1.00949e-12	1.9504e-11
NM_007797	Ctla2b	3.79558	0.0114304	0.0427454
NM_018761	Ctnnal1	-1.5453	7.89279e-22	2.8867e-20
NM_008729	Ctnnd2	0.928767	0.000241015	0.00143064
NM_016748	Ctps	0.553527	7.2133e-05	0.000477307
NM_009982	Ctsc	1.90288	4.83468e-44	4.9938e-42
NM_019861	Ctsf	-1.07128	4.40371e-08	4.94832e-07
NM_009985	Ctsw	7.06956	9.38946e-48	1.06333e-45
NM_001081084	Cubn	1.04672	0.000761197	0.00400385
NM_029402	Cul2	0.387625	0.00746482	0.029706
NM_146207	Cul4a	0.687492	6.26282e-07	6.02841e-06
NM_027807	Cul5	1.04321	0.00368347	0.0160849
NM_025611	Cul7	-0.726542	5.15772e-06	4.27325e-05
NM_030021	Cutal	-1.78874	5.93245e-08	6.55254e-07
NM_009142	Cx3cl1	0.993588	8.43091e-05	0.000550322
NM_001025192	Cxadr	-0.658971	5.38108e-06	4.44264e-05
NM_008176	Cxcl1	-4.58751	2.49122e-05	0.000180806
NM_021704	Cxcl12	-2.06013	4.63034e-46	5.0608e-44
NM_001012477	Cxcl12	-2.38664	1.70956e-10	2.62351e-09
NM_013655	Cxcl12	-2.93843	0.00396638	0.017149
NM_011339	Cxcl15	-11.9905	7.35592e-306	4.60946e-302
NM_009141	Cxcl5	-14.3592	1.85585e-07	1.91168e-06
NM_009909	Cxcr2	-1.1642	0.00144371	0.00705307
NM_030712	Cxcr6	5.2152	0.00688858	0.0276943
NM_028375	Cxx1c	-1.05409	1.62353e-08	1.93081e-07
NM_028868	Cxxc1	-1.13745	3.61226e-16	9.35355e-15
NM_001004367	Cxxc4	-1.94748	4.14647e-18	1.20478e-16
NM_133687	Cxxc5	-0.614741	3.97848e-05	0.000277725
NM_025797	Cyb5a	-0.658298	2.15094e-06	1.90644e-05
NM_025558	Cyb5b	0.764281	3.45734e-09	4.49479e-08
NM_001045525	Cyb5d1	1.6257	7.98294e-07	7.59086e-06
NM_028057	Cyb5r1	1.53595	7.17088e-27	3.48334e-25
NM_024195	Cyb5r4	0.544979	0.000170136	0.0010442
NM_007806	Cyba	-0.602454	5.05807e-06	4.19994e-05
NM_007808	Cycs	1.2234	8.25248e-12	1.4733e-10
NM_001033229	Cyp11b1	4.99544	1.97422e-15	4.89623e-14
NM_009994	Cyp1b1	-1.06756	7.68898e-15	1.82047e-13
NM_030013	Cyp20a1	1.26446	2.11567e-13	4.3231e-12
NM_007811	Cyp26a1	14.7573	1.13721e-09	1.57774e-08
NM_028979	Cyp2j9	-3.81174	2.8254e-08	3.24662e-07
NM_018887	Cyp39a1	-0.543061	0.00944798	0.0362697
NM_010010	Cyp46a1	-2.00449	1.48496e-07	1.55954e-06
NM_130882	Cyp4f13	-0.553423	0.0031333	0.0140012
NM_001101445	Cyp4f17	-0.542958	0.00921556	0.0354571
NM_020010	Cyp51	2.2538	2.62626e-62	4.79331e-60
NM_007825	Cyp7b1	-2.14639	6.98733e-06	5.65697e-05
NM_010516	Cyr61	1.59248	5.58713e-26	2.57433e-24
NM_138686	Cys1	-4.51687	7.15861e-25	3.09367e-23
NM_001004455	Cys1	-5.80596	3.13721e-10	4.65849e-09
NM_139200	Cytip	-4.43133	9.03645e-12	1.6102e-10
NR_028577	D030025P21Rik	4.19428	0.00204047	0.00954912
NM_177640	D030056L22Rik	-0.473245	0.0084609	0.0330335
NM_138601	D10Jhu81e	-0.918175	1.3586e-07	1.43647e-06
NM_026579	D10Wsu102e	0.395272	0.00867209	0.033725
NM_177777	D11Wsu47e	-0.547157	0.00704505	0.0282388
NM_178882	D2hgdh	-0.940542	1.47418e-06	1.34074e-05
NR_028421	D430020J02Rik	-1.20763	0.00361171	0.015812
NM_001081022	D430042O09Rik	-0.476202	0.00741432	0.0295301
NM_194061	D630045J12Rik	-1.18962	1.13895e-07	1.21035e-06
NM_172681	D930015E06Rik	-1.27213	3.20939e-14	7.07307e-13
NR_030673	D930016D06Rik	-0.895245	3.7386e-06	3.18162e-05
NR_027958	D930048N14Rik	-3.24155	1.67183e-08	1.98288e-07
NM_001008231	Daam2	-2.14711	2.6306e-11	4.42728e-10
NM_023118	Dab2	-0.80714	0.012354	0.0456901
NM_172826	Dact2	-2.07004	6.77151e-15	1.6134e-13
NM_001081655	Dact3	1.26361	3.21292e-05	0.000228289
NM_001113358	Dad1	0.371514	0.00474731	0.0200821
NM_010017	Dag1	-1.87454	2.16627e-07	2.20724e-06
NM_198114	Dagla	-1.25533	0.000251209	0.00148179
NM_144915	Daglb	-0.595194	0.00735044	0.0293067
NM_029653	Dapk1	-0.607216	0.00272497	0.0124126
NM_177445	Dars	0.400605	0.00412615	0.0177378
NR_040524	Dbhos	-1.16243	0.00354106	0.0155352
NM_016974	Dbp	-0.983637	0.000956585	0.00491335
NM_010022	Dbt	-0.543562	0.00366422	0.016012
NM_153167	Dcaf10	0.5682	0.000115836	0.000735923
NM_198606	Dcaf13	0.380906	0.00904853	0.0349023
NM_001165980	Dcaf17	-0.513258	0.0020103	0.00942906
NM_153555	Dcaf8	-0.621442	2.75692e-06	2.40275e-05
NM_028523	Dcbld2	1.82592	1.88668e-41	1.70518e-39
NM_007831	Dcc	-15.8352	3.54423e-19	1.11418e-17
NM_177577	Dcdc2a	-5.59951	1.02239e-14	2.39352e-13
NM_001195540	Dclk1	-3.73886	5.85256e-09	7.33972e-08
NM_172928	Dclk3	-2.65464	9.03861e-50	1.06866e-47
NM_018831	Dclre1a	-0.454409	0.00965527	0.0369673
NM_146114	Dclre1c	-0.748094	0.000435553	0.00242894
NM_001190451	Dcn	-4.76454	1.15821e-33	7.88882e-32
NM_001033379	Dcp1b	-1.58886	9.97261e-08	1.06641e-06
NM_027030	Dcps	-1.15585	4.34078e-11	7.09585e-10
NM_016890	Dctn3	0.480394	0.00502325	0.0210974
NM_029775	Dcun1d5	0.511952	0.000894483	0.00463224
NM_026428	Dcxr	-0.528512	0.000394619	0.00222242
NM_025600	Dda1	0.7972	0.00326133	0.014486
NM_026993	Ddah1	1.32048	8.41771e-22	3.06676e-20
NM_015735	Ddb1	0.624199	9.09755e-07	8.5598e-06
NM_028119	Ddb2	-1.35918	4.81152e-06	4.01829e-05
NM_028102	Ddhd2	-0.486697	0.00132107	0.00652859
NM_001017966	Ddi2	1.03951	0.0079521	0.0313465
NM_001080995	Ddias	1.17422	8.22687e-11	1.30512e-09
NM_007837	Ddit3	0.564568	8.3324e-05	0.00054427
NM_029083	Ddit4	1.77053	1.46756e-17	4.08722e-16
NM_027442	Ddo	-5.15928	5.19222e-06	4.29838e-05
NM_007838	Ddost	0.395321	0.00270178	0.0123159
NM_022563	Ddr2	-0.60221	0.010638	0.0401978
NM_134040	Ddx1	0.328263	0.0135167	0.0494937
NM_007916	Ddx19a	0.389516	0.00759164	0.0301214
NM_019553	Ddx21	1.00589	3.51541e-13	7.05295e-12
NM_197982	Ddx39	1.53706	8.7579e-26	3.97681e-24
NM_010028	Ddx3x	0.48709	0.000186973	0.00113714
NM_012008	Ddx3y	0.752833	0.00096043	0.0049304
NM_134059	Ddx41	-0.595306	0.000119961	0.000758799
NM_207677	Dedd2	-0.823137	0.000686614	0.0036452
NM_001171002	Degs2	-1.52159	0.000547114	0.00298121
NM_025900	Dek	-1.15551	5.77752e-16	1.4737e-14
NM_146122	Dennd1a	-0.784959	0.00551615	0.0228896
NM_001162917	Dennd4a	0.471795	0.00906233	0.0349462
NM_201407	Dennd4b	-1.09115	1.28824e-05	9.91714e-05
NM_184088	Dennd4c	-0.417059	0.00525789	0.0219456
NM_177192	Dennd5b	0.517107	0.000495217	0.00272924
NM_027081	Dennd6b	-1.58846	8.6477e-16	2.188e-14
NM_026603	Denr	0.566786	5.57556e-05	0.000377984
NM_001037937	Deptor	-1.97181	1.92085e-06	1.71871e-05
NM_172733	Dera	0.918193	2.27767e-07	2.31448e-06
NM_024207	Derl1	0.807055	3.70747e-07	3.70333e-06
NM_134095	Desi1	0.420012	0.00283736	0.0128591
NM_024282	Desi2	0.522449	0.000370601	0.002101
NM_010047	Dgcr6	-0.694672	0.00011152	0.000709555
NM_016811	Dgka	0.42598	0.0043451	0.0185983
NM_177646	Dgkd	-0.412442	0.0067683	0.027275
NM_019505	Dgke	0.622475	0.00386379	0.0167633
NM_177914	Dgkk	5.62622	1.73136e-151	2.9589e-148
NM_013764	Dguok	-0.624513	0.00334937	0.0148117
NM_053272	Dhcr24	1.78844	3.62465e-34	2.52369e-32
NM_007856	Dhcr7	1.07693	3.7526e-11	6.17193e-10
NM_001039514	Dhps	0.704094	5.20675e-06	4.30817e-05
NM_007839	Dhx15	0.478048	0.0119191	0.0443083
NM_026987	Dhx16	-0.507735	0.000668469	0.00356067
NM_027883	Dhx34	-0.793638	0.00490112	0.0206537
NM_145742	Dhx35	-0.599847	0.000746637	0.00393386
NM_028136	Dhx36	0.575802	6.35536e-05	0.000425327
NM_177852	Dido1	-1.38134	0.000580858	0.00314322
NM_011805	Dido1	-0.929692	0.00111767	0.00564512
NM_025447	Dimt1	0.837058	5.27409e-05	0.000359491
NM_172119	Dio3	-3.23725	0.00084684	0.00440868
NR_002866	Dio3os	-4.22328	1.51743e-06	1.37807e-05
NM_026866	Disp1	0.38511	0.00618237	0.0252218
NM_178118	Dixdc1	-1.12246	9.00837e-09	1.10613e-07
NM_020265	Dkk2	2.89298	3.23378e-16	8.38508e-15
NM_015814	Dkk3	1.00007	6.20963e-15	1.48329e-13
NM_145614	Dlat	0.430519	0.00315759	0.0140896
NM_007861	Dld	0.369252	0.00951329	0.036498
NR_028264	Dleu2	-2.3419	3.33719e-15	8.12641e-14
NM_001042487	Dlgap4	1.48675	7.36688e-17	1.9841e-15
NM_144553	Dlgap5	-1.47723	0.00444081	0.0189777
NM_030225	Dlst	0.376186	0.00579877	0.0238745
NM_007868	Dmd	1.06525	2.98327e-06	2.58787e-05
NM_001081371	Dmxl1	0.575585	0.000286501	0.00167057
NM_001033668	Dnah1	-3.24744	2.98986e-06	2.59135e-05
NM_001160386	Dnah7b	-1.33133	3.39137e-10	5.02004e-09
NM_019794	Dnaja2	0.452677	0.000536657	0.00293359
NM_021422	Dnaja4	0.539648	0.00212099	0.00988409
NM_018808	Dnajb1	0.36415	0.00879698	0.0340838
NM_001159883	Dnajb2	-0.572062	0.0085882	0.0334403
NM_019874	Dnajb5	0.445104	0.00773707	0.0306097
NM_013760	Dnajb9	0.610379	9.51886e-05	0.000615354
NM_024181	Dnajc10	0.629083	2.26003e-06	1.99747e-05
NM_139139	Dnajc17	-1.13077	0.00488579	0.0206076
NM_001033165	Dnajc25	0.741297	0.000196819	0.00118895
NM_008929	Dnajc3	0.716348	1.81074e-07	1.87136e-06
NM_025718	Dnase1l2	-1.16158	0.00139705	0.00685184
NM_010062	Dnase2a	-0.992714	6.27849e-08	6.9266e-07
NM_173383	Dnd1	-1.14756	0.0130433	0.0479562
NM_010065	Dnm1	-1.27845	6.70902e-08	7.38425e-07
NM_001039520	Dnm2	0.483473	0.0115418	0.043136
NM_021791	Doc2g	-1.2312	0.000323929	0.0018651
NM_001009947	Dock11	-0.928981	1.80642e-10	2.76313e-09
NM_177780	Dock5	1.40493	2.50195e-14	5.61267e-13
NM_177030	Dock6	-0.750364	0.00322096	0.0143315
NM_010070	Dok1	1.1839	3.58413e-13	7.17551e-12
NM_010071	Dok2	-3.7704	3.0948e-09	4.04866e-08
NM_013739	Dok3	-1.18974	0.0136572	0.0499596
NM_027293	Dopey2	-0.63645	8.05753e-05	0.000527598
NM_011262	Dpf2	-0.736615	9.43669e-08	1.01488e-06
NM_010074	Dpp4	-16.0033	2.33895e-21	8.28058e-20
NM_031843	Dpp7	-0.692641	0.00209337	0.00976752
NM_028906	Dpp8	0.728766	1.71371e-07	1.7789e-06
NM_019759	Dpt	-1.40198	1.09782e-06	1.02067e-05
NM_001081201	Dpy19l4	1.2316	8.64474e-07	8.17879e-06
NM_026106	Dr1	0.715859	1.9797e-06	1.76464e-05
NM_027878	Dram1	-1.96302	3.17955e-16	8.26727e-15
NM_001033460	Drc1	-2.26092	0.000214883	0.00128526
NM_029044	Drc3	-1.85917	0.000405814	0.00228068
NM_031174	Dscam	-1.68248	0.00132753	0.00654757
NM_172508	Dse	0.929559	8.27739e-10	1.16211e-08
NM_001081316	Dsel	-0.401154	0.00756815	0.0300473
NM_007883	Dsg2	-2.66585	0.000133559	0.000838603
NM_019771	Dstn	1.43775	5.33023e-29	2.90444e-27
NM_172516	Dstyk	-0.474188	0.00187833	0.00888097
NM_025314	Dtd1	-0.985465	0.000149247	0.000928728
NM_207650	Dtna	-0.490463	0.00316492	0.014119
NM_025772	Dtnbp1	-0.624407	2.29668e-05	0.000167997
NM_030714	Dtx3	-0.7975	2.26833e-09	3.02858e-08
NM_172442	Dtx4	-1.40396	3.66923e-25	1.6192e-23
NM_023136	Dtymk	0.673311	0.00562909	0.0232933
NM_144858	Dus3l	-0.708268	0.00201275	0.00943582
NM_013642	Dusp1	1.0799	2.99458e-14	6.63075e-13
NM_019819	Dusp14	1.09082	1.14349e-11	2.0034e-10
NM_173745	Dusp18	0.64984	1.47954e-05	0.000112835
NM_026725	Dusp23	-1.10396	2.90821e-06	2.5264e-05
NM_175118	Dusp28	1.14586	4.82789e-06	4.02839e-05
NM_028207	Dusp3	0.56408	8.36458e-05	0.000546182
NM_176933	Dusp4	2.59288	7.43209e-16	1.8855e-14
NM_001085390	Dusp5	0.913935	0.00786971	0.0310804
NM_026268	Dusp6	1.63352	3.8272e-15	9.26339e-14
NM_008748	Dusp8	0.74294	8.18373e-05	0.000535303
NM_007888	Dvl2	-0.541422	0.000466412	0.00258569
NM_027727	Dym	0.418911	0.00288221	0.0130372
NM_146229	Dync1li1	0.854142	1.85874e-08	2.18938e-07
NM_029851	Dync2h1	-0.956366	4.7066e-08	5.27605e-07
NM_172256	Dync2li1	-1.21241	4.43499e-16	1.1421e-14
NM_025975	Dynlt3	0.919209	1.03646e-11	1.8278e-10
NM_001014390	Dyrk2	1.54521	1.00729e-11	1.78137e-10
NM_145508	Dyrk3	1.51879	4.22699e-14	9.17589e-13
NM_025943	Dzip1	-1.43121	3.98525e-25	1.75044e-23
NR_038037	E130307A14Rik	-1.8476	4.02321e-17	1.10412e-15
NM_001015681	E130308A19Rik	-1.19969	2.4972e-07	2.53072e-06
NM_177856	E130311K13Rik	-0.609039	0.00975224	0.0372406
NR_029447	E130317F20Rik	-1.01196	6.45554e-05	0.000431111
NM_172831	E230025N22Rik	-5.04029	2.71924e-13	5.49666e-12
NM_010093	E2f3	0.922024	1.63011e-06	1.47258e-05
NM_007892	E2f5	-0.612994	0.000265943	0.00156087
NR_026942	E330013P04Rik	1.47979	1.69572e-07	1.76218e-06
NR_030690	E330033B04Rik	-1.60846	9.2273e-05	0.000597946
NM_007893	E4f1	-0.985965	5.47203e-08	6.08691e-07
NR_033503	E530011L22Rik	-1.20311	1.5764e-05	0.000119543
NM_028932	Eaf1	1.17262	4.16611e-14	9.06467e-13
NM_001110513	Ebf4	-1.52577	2.50392e-18	7.41279e-17
NM_026932	Ebna1bp2	0.451879	0.00139271	0.00683415
NM_007898	Ebp	0.654384	8.14147e-06	6.5295e-05
NM_025462	Ece2	1.30138	3.76865e-08	4.26789e-07
NM_016772	Ech1	-1.19477	6.49109e-17	1.75577e-15
NM_001110195	Echdc1	2.0356	0.00428645	0.0183556
NM_025855	Echdc1	0.876287	0.0119626	0.0444524
NM_026728	Echdc2	-1.04078	1.11024e-10	1.73064e-09
NM_024208	Echdc3	-1.40293	1.86376e-07	1.91772e-06
NM_010023	Eci1	-0.739715	5.4594e-07	5.30943e-06
NM_001161433	Eda2r	1.26296	1.85893e-09	2.5155e-08
NM_138677	Edem1	0.938124	3.83374e-10	5.65258e-09
NM_001039644	Edem3	0.709053	1.98531e-06	1.76881e-05
NM_010332	Ednra	-3.41752	3.08545e-09	4.03923e-08
NM_001001932	Eea1	0.867728	2.83715e-10	4.23634e-09
NM_021876	Eed	0.560808	0.000408426	0.00229331
NM_026526	Eef1akmt1	0.42938	0.00963256	0.0368954
NM_018796	Eef1b2	0.623276	0.00149528	0.00727288
NM_025380	Eef1e1	1.26525	9.11059e-13	1.76567e-11
NM_026007	Eef1g	0.962752	4.14585e-14	9.03104e-13
NM_026626	Efcab2	-0.917231	0.00871665	0.0338773
NM_146015	Efemp1	-3.26436	7.23708e-15	1.71997e-13
NM_028889	Efhd1	-1.82925	0.00469454	0.0199036
NM_010107	Efna1	1.22508	0.00785037	0.0310301
NM_010108	Efna3	0.89724	0.00864041	0.0336226
NM_007910	Efna4	-0.632668	0.000262641	0.00154342
NM_010111	Efnb2	1.06077	3.23766e-15	7.90453e-14
NM_152922	Egfl8	-2.44054	5.41848e-15	1.29761e-13
NM_007912	Egfr	-0.810169	0.00328157	0.014553
NM_053207	Egln1	0.985936	3.99787e-13	7.95302e-12
NM_007913	Egr1	-1.42582	3.1722e-09	4.14414e-08
NM_010118	Egr2	1.4097	2.00115e-06	1.78123e-05
NM_001114597	Ehbp1l1	1.67679	4.62765e-11	7.55823e-10
NM_053252	Ehbp1l1	2.11569	1.61018e-06	1.45738e-05
NM_010119	Ehd1	1.10527	2.29636e-16	5.99572e-15
NM_007914	Ehf	-6.63876	1.74172e-18	5.2138e-17
NM_025613	Eid1	-1.31549	2.18773e-21	7.77451e-20
NM_011508	Eif1	0.803509	1.53704e-09	2.09991e-08
NM_010120	Eif1a	0.334438	0.0107806	0.0406549
NM_026892	Eif1b	-0.44793	0.00642364	0.0260535
NM_001005509	Eif2a	0.353187	0.0112191	0.0420219
NM_010121	Eif2ak3	1.22846	4.88567e-16	1.25472e-14
NM_001136070	Eif2d	0.638705	0.00959355	0.0367609
NM_026114	Eif2s1	0.913851	9.90908e-12	1.75903e-10
NM_026030	Eif2s2	0.937157	2.35844e-13	4.7983e-12
NM_012010	Eif2s3x	0.682112	3.72206e-07	3.71594e-06
NM_010123	Eif3a	0.820753	2.18001e-10	3.305e-09
NM_133916	Eif3b	0.364085	0.00478118	0.0202162
NM_146200	Eif3c	0.461921	0.000301349	0.0017447
NM_144545	Eif3j1	0.719791	1.05697e-07	1.12961e-06
NM_145139	Eif3l	0.562602	1.24856e-05	9.65115e-05
NM_144958	Eif4a1	0.733901	0.00523271	0.0218502
NM_145625	Eif4b	-0.417937	0.000861703	0.0044783
NM_001039169	Eif4e2	0.64932	0.000110447	0.00070359
NM_025829	Eif4e3	2.09392	3.55038e-07	3.55587e-06
NM_007918	Eif4ebp1	1.44733	9.07911e-28	4.61293e-26
NM_201256	Eif4ebp3	-0.954653	0.0065362	0.0264416
NM_013507	Eif4g2	1.32001	4.63155e-07	4.54666e-06
NM_173363	Eif5	1.10045	2.70793e-06	2.36554e-05
NM_177586	Eif5a2	0.67744	0.000154705	0.000959835
NM_198303	Eif5b	0.44244	0.000545948	0.00297659
NM_053255	Elac1	-0.48806	0.0123534	0.0456901
NM_010485	Elavl1	0.660363	1.62235e-06	1.46698e-05
NM_007922	Elk1	0.59841	0.000223786	0.00133427
NM_013508	Elk3	0.926686	6.82282e-12	1.22857e-10
NM_007923	Elk4	0.842805	0.0116876	0.0435965
NM_007924	Ell	-0.433021	0.00985951	0.0376114
NM_172760	Elmo3	-0.979145	0.00195068	0.0091792
NM_144917	Elmod3	-0.911538	2.98773e-07	3.00979e-06
NM_007925	Eln	-2.17137	0.000923401	0.00476372
NM_013736	Eloa	0.509271	0.000375314	0.0021258
NM_026456	Eloc	1.02774	4.33045e-12	7.94226e-11
NM_134255	Elovl5	0.549654	0.00011822	0.0007493
NM_130450	Elovl6	0.93309	1.54234e-09	2.10563e-08
NM_029001	Elovl7	-1.2868	6.60774e-10	9.38919e-09
NM_010330	Emb	-0.703263	0.00116737	0.00585991
NM_197991	Emc10	-0.672359	1.53593e-06	1.39393e-05
NM_025736	Emc2	-0.431412	0.0012223	0.0060982
NM_007927	Emd	0.496857	0.000330988	0.00189818
NM_145158	Emilin2	-2.22621	1.64153e-05	0.000123982
NM_144872	Eml3	-0.91712	2.31982e-08	2.69366e-07
NM_001114361	Eml4	-1.01564	0.00181806	0.00863511
NM_010128	Emp1	1.10403	6.16057e-16	1.56715e-14
NM_172280	Emsy	-0.675779	0.00028837	0.00167939
NM_010132	Emx2	0.642723	4.7588e-06	3.97957e-05
NM_007930	Enc1	0.586997	2.91778e-05	0.000209356
NM_028013	Endod1	1.85955	1.2201e-33	8.28041e-32
NM_198299	Enkd1	-0.526355	0.0117528	0.0437941
NM_027728	Enkur	-1.41047	3.0678e-08	3.50374e-07
NM_023119	Eno1	1.18952	4.14025e-20	1.36548e-18
NM_013509	Eno2	-1.79902	8.27272e-29	4.41815e-27
NM_007934	Enpep	-3.36102	9.44878e-100	4.22923e-97
NM_008813	Enpp1	-0.73027	3.9232e-05	0.000274172
NM_134005	Enpp3	2.45297	0.000160763	0.000992182
NM_019561	Ensa	-0.772233	0.00208782	0.00975003
NM_053103	Entpd7	0.735986	0.00102496	0.00522597
NM_175313	Eogt	0.859647	9.8299e-07	9.2028e-06
NM_013512	Epb41l4a	-0.442231	0.00154362	0.00748672
NM_145506	Epb41l5	-1.51022	2.30563e-20	7.7399e-19
NM_007935	Epc1	-0.748859	4.7005e-06	3.93782e-05
NM_134065	Epdr1	-1.05152	5.29255e-13	1.04401e-11
NM_001195633	Epg5	1.35785	4.67747e-18	1.35072e-16
NM_010139	Epha2	1.44598	2.68499e-22	1.01904e-20
NM_007936	Epha4	-1.96812	6.31802e-36	4.65774e-34
NM_010141	Epha7	-1.1323	8.38788e-15	1.97847e-13
NM_001122889	Epha7	-1.40675	0.0034464	0.0151981
NM_010142	Ephb2	1.87564	2.34225e-10	3.53954e-09
NM_010145	Ephx1	-0.776441	6.13183e-07	5.92051e-06
NM_001252189	Epn2	3.97432	0.00510396	0.0213886
NM_027984	Epn3	-1.56185	9.17829e-05	0.000594975
NM_029735	Eprs	1.10596	1.32333e-17	3.7075e-16
NM_007943	Eps15	1.82597	2.21949e-09	2.97181e-08
NM_007944	Eps15l1	-0.769798	0.00138255	0.00678602
NM_007945	Eps8	-1.5671	9.66222e-11	1.51746e-09
NM_026146	Eps8l1	-2.88878	4.46981e-21	1.56768e-19
NM_133191	Eps8l2	-1.89774	5.85357e-23	2.28301e-21
NM_030711	Erap1	0.96043	2.10131e-07	2.14571e-06
NM_001003817	Erbb2	-1.4096	2.20265e-15	5.42695e-14
NM_053204	Erc1	0.427638	0.00697448	0.0279858
NM_177814	Erc2	1.69739	1.23238e-07	1.30669e-06
NM_011729	Ercc5	0.353237	0.011149	0.0418092
NM_007950	Ereg	1.99305	1.14954e-10	1.79018e-09
NM_173395	Erfe	4.16152	1.69527e-44	1.76074e-42
NM_026170	Ergic1	0.651835	6.18537e-07	5.96226e-06
NM_025516	Ergic3	-0.552686	2.20304e-05	0.000162173
NM_007951	Erh	0.685276	5.29998e-07	5.1624e-06
NM_001034862	Erich1	0.470455	0.0104437	0.0395512
NM_025744	Erich2	-2.54871	1.07431e-13	2.2465e-12
NM_023913	Ern1	0.892035	0.00824935	0.0323284
NM_015774	Ero1l	0.89246	7.96256e-11	1.2664e-09
NM_026184	Ero1lb	0.989388	0.00441623	0.0188812
NM_026129	Erp29	0.436651	0.00365827	0.01599
NM_029572	Erp44	0.461934	0.000643034	0.00343811
NM_016903	Esd	0.7795	1.33809e-09	1.8388e-08
NM_001081090	Esf1	0.604383	0.00125155	0.00622264
NM_011843	Esyt1	0.366178	0.00523082	0.0218472
NM_028731	Esyt2	0.759213	3.71412e-08	4.21121e-07
NM_144866	Etf1	0.639395	1.18909e-06	1.09684e-05
NM_026695	Etfb	-0.417443	0.00325093	0.0144478
NM_023154	Ethe1	0.908764	4.56608e-09	5.85524e-08
NM_011808	Ets1	1.3388	0.000423983	0.00237075
NM_011809	Ets2	-0.767788	1.94444e-07	1.99746e-06
NM_008815	Etv4	1.84144	2.29837e-30	1.363e-28
NM_023794	Etv5	2.16743	4.65128e-13	9.21384e-12
NM_007961	Etv6	0.818262	8.56164e-09	1.05541e-07
NM_145570	Eva1a	2.98985	5.5718e-24	2.30207e-22
NM_021292	Evc	-2.01847	3.09837e-20	1.02909e-18
NM_145920	Evc2	-0.703657	3.93681e-06	3.34122e-05
NM_025588	Exoc2	0.485588	0.000765904	0.00402297
NM_207214	Exoc5	0.816266	4.39728e-09	5.65067e-08
NM_175353	Exoc6	0.655609	0.00612333	0.0250353
NM_025644	Exosc1	0.964223	0.00140522	0.00688653
NM_019393	Exosc9	0.423025	0.0066506	0.0268581
NM_010162	Ext1	0.950014	1.50794e-13	3.12545e-12
NM_021388	Extl2	4.67811	7.35314e-05	0.000485876
NM_018788	Extl3	0.766777	1.96695e-08	2.31394e-07
NM_007970	Ezh1	-1.42561	4.7837e-14	1.03366e-12
NM_009510	Ezr	-1.2871	8.84522e-22	3.21627e-20
NM_010169	F2r	0.77799	1.14081e-09	1.58157e-08
NM_007974	F2rl1	0.662306	0.00700614	0.0281068
NM_010170	F2rl2	13.0931	0.0027418	0.0124802
NM_010171	F3	-0.900019	0.00286277	0.0129617
NM_001101475	F830016B08Rik	-1.17537	0.00531546	0.0221564
NM_010173	Faah	-3.07441	4.17919e-13	8.30492e-12
NM_027980	Faap100	-1.47511	2.80351e-09	3.69329e-08
NM_010174	Fabp3	1.42687	1.71365e-07	1.7789e-06
NM_010634	Fabp5	1.47931	2.42872e-12	4.54304e-11
NM_146094	Fads1	1.14571	1.28782e-18	3.91391e-17
NM_019699	Fads2	1.63413	1.09699e-32	7.21062e-31
NM_021890	Fads3	0.757158	1.28218e-08	1.54411e-07
NM_007983	Faf1	0.418838	0.0030314	0.013604
NM_178397	Faf2	0.416674	0.0027484	0.0125042
NM_023480	Fahd1	-0.489685	0.0109539	0.041168
NM_153560	Fam102a	-0.933896	2.49199e-05	0.000180806
NM_001163567	Fam102b	-0.541296	0.000470362	0.00260605
NM_173426	Fam110b	-1.87296	1.29879e-14	3.00689e-13
NM_027828	Fam110c	2.47342	1.997e-11	3.41598e-10
NM_026667	Fam114a1	1.24488	5.03611e-20	1.64737e-18
NM_133750	Fam118a	0.595311	0.00137759	0.00676521
NR_015601	Fam120aos	-1.00175	5.0887e-05	0.000347485
NM_053090	Fam126a	0.703209	2.666e-06	2.334e-05
NM_172513	Fam126b	0.505256	0.00558415	0.0231277
NM_022018	Fam129a	1.16312	1.19615e-10	1.85685e-09
NM_001166213	Fam129c	-0.89243	0.000653297	0.00348802
NM_133778	Fam131a	-1.74937	0.000699198	0.00370573
NM_026125	Fam132a	-1.03307	2.63045e-05	0.000189899
NM_001042501	Fam133b	-0.427247	0.0039288	0.0170022
NM_170755	Fam134a	-1.12262	3.73861e-15	9.06866e-14
NM_153574	Fam13a	-3.81529	2.87306e-09	3.77697e-08
NM_146084	Fam13b	0.515512	0.00161455	0.00777656
NM_001143777	Fam13c	-3.49008	0.00794875	0.0313399
NM_001195732	Fam150a	2.53711	2.25679e-10	3.41865e-09
NM_001163627	Fam151b	-0.843693	0.00235877	0.0108763
NM_172682	Fam160a1	0.520919	0.0103557	0.039273
NM_172581	Fam161b	-2.94206	2.62052e-25	1.16461e-23
NM_027342	Fam162a	1.36117	1.18906e-21	4.29867e-20
NM_001162532	Fam174b	3.80352	7.42188e-05	0.000490188
NM_172405	Fam175a	-0.480611	0.00783472	0.0309747
NM_177087	Fam179a	-12.884	0.00456957	0.0194439
NM_173375	Fam180a	-4.6071	2.99527e-08	3.43132e-07
NM_024185	Fam188a	-0.61886	1.47612e-05	0.000112638
NM_001142781	Fam188b	-1.00905	0.00103992	0.00528834
NM_183087	Fam189a1	1.24537	3.32362e-08	3.78442e-07
NM_001243123	Fam193a	-0.51962	0.000160265	0.000989435
NM_145382	Fam193b	-1.37559	7.52715e-05	0.000496327
NM_001143802	Fam196a	-1.90144	4.07923e-11	6.68574e-10
NM_133187	Fam198b	2.55408	1.05542e-78	3.00618e-76
NM_146261	Fam199x	0.626264	0.000982258	0.00502462
NM_182808	Fam19a1	-3.95057	1.59171e-14	3.644e-13
NM_029648	Fam204a	0.514201	0.00521025	0.0217661
NM_134063	Fam208b	1.16931	2.91041e-14	6.4596e-13
NM_153782	Fam20a	1.35581	1.33398e-15	3.34366e-14
NM_145413	Fam20b	0.448253	0.00191607	0.00903217
NM_030565	Fam20c	-1.09971	5.8673e-10	8.41338e-09
NM_025912	Fam210b	2.27159	7.44248e-44	7.60387e-42
NM_001113283	Fam214a	2.08482	0.0109182	0.0410584
NM_172691	Fam214b	0.64931	9.5238e-05	0.000615462
NM_001004180	Fam222a	-3.21371	0.00552052	0.0228994
NM_029407	Fam227a	-1.73557	2.97794e-10	4.436e-09
NM_183254	Fam229b	-1.58148	1.56799e-08	1.86916e-07
NM_028982	Fam234b	0.565861	0.00386165	0.0167617
NM_025473	Fam3a	-0.430051	0.0113314	0.0424005
NM_138587	Fam3c	-0.717572	1.36655e-07	1.44406e-06
NM_177632	Fam43a	-3.55078	6.86003e-11	1.10036e-09
NM_026437	Fam45a	1.61058	0.000349994	0.00199804
NM_175307	Fam46b	-1.04131	2.5703e-05	0.000185784
NM_144846	Fam49b	0.617122	6.38384e-05	0.000426929
NM_019643	Fam60a	1.21493	1.18681e-17	3.33496e-16
NM_199475	Fam63a	-1.11961	0.000193953	0.00117314
NM_172772	Fam63b	-0.918602	1.58728e-09	2.16383e-08
NM_001081241	Fam65a	-0.5123	8.7702e-05	0.000569699
NM_019833	Fam69b	-1.72138	0.000105558	0.000676573
NM_175382	Fam72a	1.27505	0.000694024	0.00368038
NM_001162926	Fam84b	-0.41989	0.0124674	0.0460649
NM_001033192	Fam8a1	1.80086	4.35844e-14	9.45032e-13
NM_145959	Fam91a1	1.03593	1.23845e-14	2.87073e-13
NM_133747	Fam98a	0.651566	3.28585e-06	2.82833e-05
NM_026620	Fam98b	0.675653	8.07188e-06	6.47645e-05
NM_001115087	Fancf	-0.727717	0.00740094	0.0294892
NM_025923	Fancl	-1.0204	0.00267509	0.012212
NM_011811	Farsb	0.912057	2.50544e-10	3.771e-09
NM_007988	Fasn	0.585126	4.86956e-06	4.05595e-05
NM_183221	Fat4	-1.10396	0.000111534	0.000709555
NM_001081437	Fbln2	3.73322	5.65373e-120	5.06117e-117
NM_007992	Fbln2	2.45088	4.79119e-18	1.38143e-16
NM_011812	Fbln5	-2.1207	3.94226e-15	9.51355e-14
NM_024237	Fbln7	-4.41681	3.68286e-07	3.6807e-06
NM_007993	Fbn1	1.804	1.19373e-34	8.46828e-33
NM_001159963	Fbxl5	-0.653985	2.19426e-05	0.000161638
NM_176959	Fbxl7	-0.851082	5.02019e-07	4.90257e-06
NM_001024142	Fbxo10	-1.27535	9.08417e-15	2.13734e-13
NM_015792	Fbxo18	0.39581	0.00707871	0.0283424
NM_176848	Fbxo2	-3.25203	7.70556e-16	1.95225e-14
NM_145564	Fbxo21	-1.17967	5.97488e-14	1.28075e-12
NM_133765	Fbxo31	-0.660509	0.00765353	0.0303286
NM_026346	Fbxo32	0.62406	0.000107868	0.000689732
NM_025386	Fbxo36	-1.01325	6.59636e-06	5.35428e-05
NM_134136	Fbxo38	0.383022	0.00580197	0.0238825
NM_153195	Fbxo7	-1.7389	1.3568e-27	6.8199e-26
NM_134015	Fbxw11	0.371767	0.00712253	0.0285068
NM_001164769	Fbxw2	-1.86951	4.04846e-08	4.5655e-07
NM_013908	Fbxw5	-0.492275	0.00881842	0.0341457
NM_001177773	Fbxw7	2.7084	0.00610399	0.0249617
NM_010188	Fcgr3	14.4394	6.83309e-08	7.49885e-07
NM_010189	Fcgrt	-1.85689	5.70128e-34	3.95492e-32
NM_175684	Fchsd1	-0.604766	0.0030598	0.0137184
NM_010191	Fdft1	1.52563	1.55144e-30	9.28839e-29
NM_134469	Fdps	2.3703	5.21179e-58	8.03086e-56
NM_010193	Fem1b	0.46367	0.00104281	0.00529977
NM_198029	Fermt1	6.84743	3.56068e-07	3.56429e-06
NM_146054	Fermt2	0.778909	1.88128e-09	2.53885e-08
NM_010194	Fes	1.1296	0.00256411	0.0117482
NM_183171	Fez1	0.658922	0.000335707	0.00192231
NM_199448	Fez2	1.04424	7.79911e-15	1.84422e-13
NM_181849	Fgb	-6.46874	4.39183e-37	3.39762e-35
NM_015759	Fgd3	2.08192	9.03676e-18	2.57397e-16
NM_010197	Fgf1	3.28288	5.81329e-14	1.24896e-12
NM_008005	Fgf18	-1.49773	5.66734e-05	0.000383101
NM_008006	Fgf2	14.3835	5.63111e-07	5.47076e-06
NM_020013	Fgf21	5.78011	3.02798e-12	5.59714e-11
NM_008008	Fgf7	-1.10825	4.68504e-05	0.000322734
NM_028263	Fgfbp3	-0.762904	0.00962684	0.036881
NM_001079909	Fgfr1	2.22459	3.02296e-11	5.04694e-10
NM_001079908	Fgfr1	1.44183	0.00200585	0.00941052
NM_010207	Fgfr2	-2.83609	1.36778e-07	1.44455e-06
NM_010210	Fhit	-1.36374	2.85739e-07	2.88331e-06
NM_001077362	Fhl1	2.61344	0.000631919	0.00338061
NM_010212	Fhl2	-0.355508	0.00556279	0.0230569
NM_010213	Fhl3	0.902171	2.06785e-10	3.14256e-09
NM_177699	Fhod1	-0.419359	0.00482385	0.0203829
NM_175276	Fhod3	-1.06602	2.8359e-11	4.74307e-10
NM_026271	Fibin	3.45304	2.58918e-24	1.08647e-22
NM_001010825	Ficd	0.69295	0.000191311	0.00115977
NM_133999	Fig4	-0.398025	0.00807505	0.0317509
NM_021716	Fign	-2.02469	3.09895e-05	0.000220922
NR_015505	Firre	-0.644212	4.89251e-06	4.07146e-05
NM_010221	Fkbp10	1.08245	2.64894e-08	3.05506e-07
NM_024169	Fkbp11	1.30059	8.79705e-07	8.31034e-06
NM_153573	Fkbp14	1.57571	1.83616e-24	7.77433e-23
NM_008019	Fkbp1a	0.907785	1.38722e-12	2.65834e-11
NM_013902	Fkbp3	-0.367299	0.00872394	0.0338986
NM_010220	Fkbp5	2.40975	7.43148e-26	3.40742e-24
NM_010222	Fkbp7	0.74516	1.54204e-07	1.61228e-06
NM_012056	Fkbp9	0.439638	0.000839801	0.00437931
NM_019873	Fkbpl	-0.768452	0.000203918	0.0012267
NM_146018	Flcn	-0.438682	0.00975149	0.0372406
NM_010227	Flna	1.23081	2.75339e-22	1.03938e-20
NM_134080	Flnb	1.54867	2.73965e-33	1.83284e-31
NM_008027	Flot1	-0.553024	0.000477353	0.00264089
NM_201411	Flrt1	-2.57918	3.64769e-13	7.29499e-12
NM_201518	Flrt2	0.801752	2.31203e-08	2.68627e-07
NM_029798	Flywch2	-2.32138	0.00019282	0.00116704
NM_010233	Fn1	3.00118	2.48e-111	1.72672e-108
NM_001038699	Fn3k	-15.478	3.02509e-15	7.39515e-14
NM_022014	Fn3k	-15.2043	8.69836e-13	1.69276e-11
NM_181420	Fn3krp	-0.982358	4.21677e-05	0.00029327
NM_018828	Fnbp4	-0.566815	5.77301e-05	0.000388985
NM_178699	Fndc10	-0.775733	3.82328e-05	0.000267687
NM_207636	Fndc3a	-0.964472	2.60934e-12	4.86155e-11
NM_173182	Fndc3b	1.55935	1.37081e-29	7.78544e-28
NM_022424	Fndc4	-1.56374	7.67147e-15	1.81861e-13
NM_010234	Fos	-2.04743	7.06815e-10	9.99054e-09
NM_008259	Foxa1	-5.2405	2.26968e-43	2.24567e-41
NM_008592	Foxc1	-1.6369	4.81407e-33	3.20921e-31
NM_008242	Foxd1	-2.20694	8.57607e-11	1.3548e-09
NM_021899	Foxj2	-0.576008	0.00112009	0.0056543
NM_199068	Foxk1	0.460436	0.00224677	0.0103981
NM_001080932	Foxk2	0.853971	6.0081e-10	8.58908e-09
NM_008021	Foxm1	-0.618082	0.00402597	0.0173667
NM_180974	Foxn2	0.835574	8.24591e-05	0.000538995
NM_019739	Foxo1	0.553568	0.000159752	0.000986592
NM_053202	Foxp1	1.94678	0.00172808	0.00825568
NM_001197322	Foxp1	1.18936	0.00344881	0.015205
NM_010226	Foxs1	1.70551	0.000587202	0.00317299
NM_029330	Fpgt	1.08011	5.33175e-09	6.74053e-08
NM_175473	Fras1	-5.20359	3.71956e-90	1.42702e-87
NM_008043	Frat1	-1.8113	0.00185974	0.00880414
NM_177603	Frat2	-1.81405	0.000364672	0.00206926
NM_013522	Frg1	-0.421816	0.00173618	0.0082881
NM_145148	Frmd4b	-3.75067	2.52952e-11	4.26863e-10
NM_009146	Frrs1	13.2764	0.0091655	0.0353078
NM_172887	Fry	-2.45479	3.2283e-11	5.35647e-10
NM_028194	Fryl	-0.399318	0.00540796	0.0225021
NM_007984	Fscn1	0.8025	0.000308545	0.00178417
NM_183178	Fsd1	-0.660135	0.00974144	0.0372214
NM_001195284	Fsd1l	-1.19678	5.83302e-06	4.78843e-05
NM_008047	Fstl1	1.08678	1.14466e-17	3.22132e-16
NM_010239	Fth1	-1.11391	1.09744e-07	1.17087e-06
NM_025310	Ftsj3	0.543856	0.000174525	0.00106869
NR_028381	Ftx	-1.6586	0.000123664	0.000780907
NR_028380	Ftx	-0.674988	0.00556727	0.0230679
NM_001033389	Fubp3	0.633419	4.66007e-05	0.000321367
NM_024243	Fuca1	-0.37925	0.00773288	0.0306043
NM_026928	Fuom	-0.945527	0.00504234	0.0211511
NM_028428	Fut11	-0.971488	0.00143696	0.0070256
NM_010242	Fut4	2.17365	0.00156319	0.00757186
NM_016893	Fut8	0.728696	1.96904e-06	1.75598e-05
NM_027376	Fuz	-1.51418	2.28754e-05	0.000167491
NM_008761	Fxyd5	4.07001	1.2738e-13	2.64892e-12
NM_027226	Fyttd1	0.985929	0.000192581	0.00116597
NM_021457	Fzd1	-0.731188	1.13659e-06	1.05358e-05
NM_008057	Fzd7	-0.758639	1.58708e-07	1.65845e-06
NM_008058	Fzd8	-0.711825	5.68185e-05	0.000383806
NM_008059	G0s2	4.77819	2.46926e-09	3.27591e-08
NM_013716	G3bp1	0.458524	0.000536011	0.00293091
NR_029457	G530011O06Rik	-0.878165	0.000136698	0.000856024
NM_021331	G6pc2	-4.95798	2.55623e-10	3.83516e-09
NM_021356	Gab1	-0.711973	7.48135e-07	7.13556e-06
NM_181584	Gab3	-1.60755	0.00391259	0.0169476
NM_020590	Gabarapl1	-1.16621	1.30259e-18	3.9481e-17
NM_026693	Gabarapl2	0.509367	0.000343908	0.00196748
NM_019439	Gabbr1	-1.15999	1.76886e-14	4.01603e-13
NM_008065	Gabpa	0.560338	0.000168239	0.00103411
NM_010249	Gabpb1	1.00462	0.00807757	0.0317509
NM_017369	Gabre	1.6281	3.73481e-07	3.72644e-06
NR_040496	Gad1os	-1.7902	0.0021399	0.0099574
NM_007836	Gadd45a	3.43965	1.18813e-36	9.04276e-35
NM_008655	Gadd45b	1.87784	5.03427e-05	0.000344393
NM_183358	Gadd45gip1	-0.51887	0.000243171	0.00144207
NM_178389	Gale	2.28279	3.11122e-22	1.16742e-20
NM_176963	Galm	-0.733488	0.00285924	0.0129489
NM_016722	Galns	-1.18902	1.69837e-05	0.000127656
NM_134189	Galnt10	0.749679	1.78685e-07	1.84769e-06
NM_172693	Galnt12	-1.69985	1.03361e-06	9.64311e-06
NM_027864	Galnt14	2.57504	7.36131e-17	1.9841e-15
NM_173739	Galnt18	2.22602	7.71208e-08	8.4046e-07
NM_139272	Galnt2	0.420369	0.00102313	0.00521805
NM_015736	Galnt3	2.76531	1.16525e-13	2.42855e-12
NM_016658	Galt	-0.629324	0.000330812	0.00189818
NM_010255	Gamt	-1.0447	0.000129245	0.000813294
NM_008060	Ganab	0.442473	0.00129485	0.00641929
NM_008083	Gap43	2.48266	3.75997e-29	2.06677e-27
NM_008084	Gapdh	0.836194	3.49448e-11	5.77773e-10
NM_025709	Gapvd1	0.545747	0.000291045	0.00169235
NM_001033445	Garem1	-0.664217	0.00850263	0.0331482
NM_001167879	Garem2	2.23111	1.02931e-11	1.81689e-10
NM_180678	Gars	1.73388	1.43944e-26	6.86801e-25
NM_010256	Gart	0.465222	0.00220253	0.0102135
NM_008086	Gas1	-3.50075	5.88542e-19	1.82273e-17
NM_008087	Gas2	-1.88906	3.18847e-16	8.27901e-15
NM_018855	Gas8	-0.499596	0.000778798	0.00408614
NM_010258	Gata6	-0.500505	0.00175085	0.00834537
NM_026033	Gatad1	0.57338	3.71754e-05	0.000260866
NM_139304	Gatad2b	0.746403	0.00159427	0.00769815
NM_144896	Gatb	-0.912805	2.27449e-05	0.000166763
NM_025961	Gatm	1.86767	6.41151e-05	0.000428627
NM_030719	Gatsl2	-0.774461	0.000140275	0.00087638
NM_001077411	Gba	0.92007	0.0012212	0.00609594
NM_172692	Gba2	-0.727738	5.48743e-05	0.000372816
NM_178930	Gbf1	0.360807	0.0117221	0.0436969
NM_018734	Gbp3	1.93184	0.00169381	0.00811673
NM_029509	Gbp8	-13.6447	8.62087e-05	0.000561163
NM_172777	Gbp9	-4.12254	2.8806e-18	8.50117e-17
NM_010262	Gbx2	5.29923	2.58226e-30	1.52175e-28
NM_008096	Gc	-4.60022	8.43689e-62	1.51052e-59
NM_010295	Gclc	-1.28685	5.53231e-20	1.80559e-18
NM_026572	Gcsh	0.752977	7.22207e-08	7.89347e-07
NM_008112	Gdi2	0.484021	0.000145346	0.000905654
NM_010275	Gdnf	1.1794	2.21759e-06	1.96273e-05
NM_025638	Gdpd1	0.42262	0.010846	0.0408768
NM_023608	Gdpd2	-14.771	1.0909e-05	8.53784e-05
NM_024228	Gdpd3	-1.40787	0.0120135	0.0445887
NM_201352	Gdpd5	0.903025	0.000377347	0.00213538
NM_010276	Gem	-1.37689	8.37162e-10	1.17446e-08
NM_177367	Gemin4	0.553585	0.00168347	0.00807952
NM_146238	Gemin8	-1.09793	7.2158e-09	8.9597e-08
NM_138591	Gfm1	0.434825	0.00547056	0.0227273
NM_001033399	Gfod1	1.20861	5.31902e-06	4.39527e-05
NM_027469	Gfod2	-0.633469	0.00112689	0.00568404
NM_013528	Gfpt1	0.650689	3.17082e-06	2.73809e-05
NM_013529	Gfpt2	4.48893	2.18805e-07	2.22823e-06
NM_010279	Gfra1	0.634398	0.010324	0.0391767
NM_145466	Ggact	-1.37312	3.62092e-22	1.35597e-20
NM_026637	Ggct	1.98324	1.04092e-11	1.83301e-10
NM_019802	Ggcx	0.678739	5.96122e-05	0.000400948
NM_010282	Ggps1	0.591774	0.000266332	0.00156169
NM_144786	Ggt7	-0.983182	1.22662e-06	1.1298e-05
NM_031871	Ghdc	-0.565711	0.00668673	0.0269866
NM_078478	Ghitm	1.76487	3.6986e-25	1.62834e-23
NM_010284	Ghr	-0.360442	0.0092591	0.0356027
NM_031408	Gigyf1	-1.5013	6.64222e-23	2.5799e-21
NM_145418	Ginm1	-0.409417	0.00468456	0.0198658
NM_027014	Gins1	-1.55384	0.00214753	0.00998797
NM_010288	Gja1	2.03224	4.57005e-23	1.79358e-21
NM_008120	Gja4	3.70392	5.70239e-05	0.000384916
NM_008125	Gjb2	4.01788	2.39357e-81	7.25753e-79
NM_001160012	Gjb3	5.05911	0.000364609	0.00206926
NM_008127	Gjb4	1.80667	4.90937e-13	9.70465e-12
NM_019832	Gkap1	-0.635044	0.000140428	0.000877046
NM_013463	Gla	0.708748	8.06912e-05	0.000528174
NM_029010	Glb1l	-1.48919	2.85169e-12	5.28688e-11
NM_033320	Glce	1.73389	4.587e-29	2.51402e-27
NM_001081125	Gli2	-2.40094	0.00123622	0.00615949
NM_028608	Glipr1	3.57102	1.92249e-57	2.91459e-55
NM_027450	Glipr2	0.987209	7.12652e-14	1.51209e-12
NM_147221	Glis1	-2.08745	0.000184873	0.00112692
NM_175459	Glis3	-1.14886	1.25732e-05	9.70695e-05
NM_010298	Glrb	1.81004	6.50641e-10	9.2592e-09
NM_008132	Glrp1	13.8504	1.87851e-05	0.000140024
NM_053108	Glrx	-1.99232	1.91159e-28	9.98222e-27
NM_023140	Glrx3	0.823399	4.30468e-10	6.30738e-09
NM_001100452	Gltscr1l	-0.555765	0.000928459	0.00478588
NM_133831	Gltscr2	-0.66284	1.13897e-06	1.05528e-05
NM_008133	Glud1	-0.855697	2.81783e-11	4.72125e-10
NM_008131	Glul	-2.1727	1.47136e-52	1.9617e-50
NM_001177577	Gm1045	4.75855	3.88704e-07	3.86531e-06
NR_040563	Gm10560	-1.80426	0.0124622	0.0460629
NR_033535	Gm10845	-0.710272	8.37796e-06	6.70963e-05
NR_038097	Gm11696	-1.29362	0.000576795	0.00312483
NM_001045540	Gm12185	1.49894	4.91283e-05	0.000336605
NR_028101	Gm12191	-2.38196	0.00129941	0.00643848
NR_033225	Gm13375	-0.659231	0.000712749	0.00376872
NR_028591	Gm14005	4.04933	7.27287e-37	5.55783e-35
NR_028590	Gm14005	3.66629	3.61195e-27	1.77287e-25
NR_028589	Gm14005	3.24713	3.92705e-11	6.44757e-10
NM_001243903	Gm14322	-0.777642	0.0031428	0.0140351
NM_001024849	Gm14325	-0.686934	0.00143395	0.00701817
NM_001190302	Gm14326	-0.611825	0.0053662	0.022337
NR_038101	Gm14327	-0.840393	2.65145e-05	0.000191195
NR_026741	Gm14379	-2.18033	0.0108605	0.040915
NM_001177480	Gm14391	-1.26098	1.3491e-06	1.235e-05
NR_040432	Gm15708	-1.38046	1.84652e-05	0.000137858
NR_045069	Gm16576	-1.89473	0.00205614	0.00962003
NR_040628	Gm17066	-0.463235	0.00110586	0.00559146
NR_045297	Gm17644	-1.42015	0.000137802	0.00086179
NR_002928	Gm1943	0.650325	0.00752191	0.0298763
NR_040296	Gm19434	3.40602	9.50921e-08	1.02151e-06
NR_045048	Gm19990	-15.7171	8.9164e-18	2.54741e-16
NR_045008	Gm20300	-0.851113	4.39193e-06	3.69579e-05
NR_033148	Gm20605	-2.07052	4.77561e-09	6.10116e-08
NR_045098	Gm2115	0.759533	1.49546e-05	0.000114003
NM_010299	Gm2a	-0.839308	8.67585e-10	1.21533e-08
NR_027380	Gm3219	-1.83852	2.71102e-12	5.04598e-11
NR_045078	Gm3716	-3.74863	3.09115e-05	0.000220533
NR_024093	Gm44505	-3.08918	2.37437e-05	0.000173141
NR_030674	Gm4532	-1.44127	0.00031775	0.00183357
NR_003623	Gm5069	-0.855073	0.00567887	0.0234683
NM_001024230	Gm5431	2.63119	2.23697e-05	0.000164333
NR_026990	Gm5577	-1.20978	0.000213966	0.001281
NR_030688	Gm6402	-1.83343	5.81368e-06	4.77518e-05
NM_001081746	Gm7609	-1.09117	0.00299681	0.0134745
NM_001198955	Gm7694	-3.46361	1.3159e-09	1.80963e-08
NR_003372	Gm7904	-12.6805	0.00968972	0.037069
NM_001033411	Gm826	-12.8213	0.00584745	0.0240433
NR_027658	Gm8883	12.9971	0.00274949	0.0125061
NR_033398	Gm9159	-1.60423	3.83088e-11	6.29516e-10
NM_001005424	Gm996	-3.23612	7.43542e-08	8.11722e-07
NM_146041	Gmds	-0.565516	0.000610003	0.00327923
NM_022023	Gmfb	0.917073	1.02004e-11	1.80224e-10
NM_198101	Gmip	-0.736815	9.41774e-05	0.000609446
NM_177910	Gmppb	1.72579	1.03937e-17	2.94264e-16
NM_025508	Gmpr	-1.38359	1.28354e-06	1.17818e-05
NM_008137	Gna14	12.9286	0.00523837	0.021869
NM_010305	Gnai1	-1.0697	3.3993e-05	0.00024051
NM_010306	Gnai3	0.686241	7.24274e-07	6.91499e-06
NM_001113384	Gnao1	0.472921	0.00226228	0.0104673
NM_010308	Gnao1	-0.489343	0.00317636	0.0141633
NM_001077510	Gnas	0.616703	0.0136627	0.0499697
NM_001160017	Gnb1	1.33078	0.00228898	0.0105752
NM_013531	Gnb4	1.04922	7.01741e-08	7.68318e-07
NM_025277	Gng10	0.812266	2.09612e-07	2.14157e-06
NM_025331	Gng11	1.74605	8.18765e-27	3.967e-25
NM_010320	Gng8	2.45599	0.00720776	0.0287866
NM_153547	Gnl3	0.618104	9.59e-06	7.56853e-05
NM_010321	Gnmt	-3.98344	0.00615648	0.0251415
NM_001038015	Gnpda2	0.676614	4.76392e-06	3.98208e-05
NM_019425	Gnpnat1	1.13648	3.83811e-14	8.3801e-13
NM_172529	Gnptg	-0.754145	9.31763e-07	8.74499e-06
NM_029364	Gns	-0.484796	0.000159723	0.000986592
NM_008146	Golga3	0.746438	9.24571e-07	8.69051e-06
NM_175193	Golim4	0.823185	1.17359e-09	1.62223e-08
NM_025673	Golph3	1.17623	2.32858e-18	6.92642e-17
NM_026680	Golt1a	-4.79243	3.90797e-16	1.00776e-14
NM_025872	Golt1b	0.704744	2.88681e-07	2.90987e-06
NM_019650	Gosr2	0.33817	0.0112147	0.0420136
NM_010324	Got1	1.09238	2.12617e-12	4.001e-11
NM_008149	Gpam	0.851266	0.00984711	0.0375793
NM_026181	Gpatch1	-0.651308	0.000350543	0.00199995
NM_174985	Gpbar1	3.63819	0.000137779	0.00086179
NM_016696	Gpc1	1.14459	1.0311e-16	2.73394e-15
NM_010271	Gpd1	-0.780314	0.0135011	0.0494463
NM_175380	Gpd1l	-0.74173	1.8779e-06	1.68428e-05
NM_029771	Gper1	1.90541	1.84182e-09	2.49815e-08
NM_133884	Gpn2	0.579304	0.00217389	0.0100931
NM_053110	Gpnmb	-3.51143	6.30875e-78	1.77012e-75
NR_003568	Gpr137b-ps	0.396778	0.0125296	0.0462396
NM_001038703	Gpr146	-13.6058	0.000110953	0.000706334
NM_177346	Gpr149	2.33126	0.000948834	0.00487887
NM_178406	Gpr153	0.716165	2.23457e-06	1.9759e-05
NM_177366	Gpr157	-1.11804	0.000292162	0.00169832
NM_201367	Gpr176	1.39677	1.41204e-15	3.5299e-14
NM_021434	Gpr180	0.72961	4.57436e-06	3.83899e-05
NM_001101516	Gpr25	4.09732	1.6554e-05	0.000124879
NM_027677	Gpr39	0.495102	0.00712991	0.0285242
NM_022427	Gpr88	-13.2671	0.000800468	0.00418931
NM_181444	Gprc5a	1.26391	6.34175e-14	1.35322e-12
NM_001110337	Gprc5c	-1.79229	8.78543e-25	3.77934e-23
NM_019726	Gps2	-1.13488	1.61535e-13	3.34437e-12
NM_134116	Gpsm3	0.560282	0.0133108	0.0487969
NM_182805	Gpt	-1.14689	0.000750216	0.00395161
NM_173866	Gpt2	1.09489	3.76077e-13	7.50518e-12
NM_001033498	Gramd2	-3.78931	2.07521e-08	2.43216e-07
NM_026240	Gramd3	-1.82051	8.74621e-33	5.78944e-31
NM_010345	Grb10	0.734315	0.00930683	0.0357643
NM_016719	Grb14	-2.11252	1.0877e-23	4.43549e-22
NM_010346	Grb7	-3.1905	0.00286785	0.0129816
NM_001083628	Greb1l	-1.39446	2.41017e-09	3.20203e-08
NM_011824	Grem1	2.74912	5.64309e-25	2.45566e-23
NM_011825	Grem2	4.49916	5.38898e-51	6.66496e-49
NM_016886	Gria3	0.400921	0.00647809	0.0262178
NM_008168	Grik5	-1.03835	8.79939e-11	1.38775e-09
NM_023168	Grina	-0.504848	7.43256e-05	0.000490607
NM_207670	Gripap1	-0.433275	0.00750621	0.0298391
NM_011881	Grk1	-1.17386	4.6802e-05	0.000322519
NM_001080743	Grk4	-0.976396	0.000109564	0.000699626
NM_019497	Grk4	-0.699871	0.011657	0.0435084
NM_008175	Grn	-0.388394	0.00243006	0.0111858
NM_024478	Grpel1	0.423562	0.00637723	0.0258988
NM_175437	Gsap	-1.10122	0.000216795	0.00129505
NM_019827	Gsk3b	0.541873	7.87136e-05	0.000516849
NM_001206367	Gsn	0.839474	0.0011148	0.00563219
NM_001130008	Gspt1	1.56873	0.00464509	0.0197118
NM_010344	Gsr	1.96121	2.86152e-38	2.29888e-36
NM_010357	Gsta4	-2.04485	7.49553e-17	2.01586e-15
NM_026231	Gstcd	0.796989	0.0037	0.0161496
NM_010358	Gstm1	-3.84161	1.44958e-53	1.9891e-51
NM_008183	Gstm2	-1.64085	1.41942e-18	4.28308e-17
NM_026672	Gstm7	-3.42027	8.16256e-12	1.45863e-10
NM_010362	Gsto1	1.98417	6.58429e-37	5.05217e-35
NM_008185	Gstt1	-3.27212	3.82467e-08	4.32612e-07
NM_010361	Gstt2	-2.09283	0.00952756	0.0365304
NM_031391	Gtf2a1	-2.997	0.00568684	0.0234857
NM_145546	Gtf2b	0.506358	0.000554864	0.00301994
NM_028812	Gtf2e1	1.06949	2.85071e-07	2.87966e-06
NM_026584	Gtf2e2	1.70914	0.0126806	0.0467549
NM_133801	Gtf2f1	-0.508353	0.000202057	0.00121707
NM_026816	Gtf2f2	-0.381339	0.0101691	0.0386435
NM_053266	Gtf2ird2	-0.662081	9.01141e-05	0.000584358
NM_027901	Gtf3c2	-0.566373	3.63981e-05	0.000255585
NM_001033194	Gtf3c3	0.630994	8.73689e-05	0.000567928
NM_148928	Gtf3c5	-0.690212	8.01354e-06	6.43514e-05
NM_026113	Gtf3c6	-0.421821	0.00875966	0.0340022
NM_013818	Gtpbp1	-0.519251	0.00255051	0.0116916
NM_027000	Gtpbp4	0.68359	2.96877e-06	2.57663e-05
NM_028450	Gulp1	-1.10079	8.828e-08	9.53232e-07
NM_001048207	Gypc	-0.478404	0.00144914	0.00707453
NM_030678	Gys1	0.558943	0.000282557	0.00164962
NM_010373	Gzme	2.83653	0.0063528	0.025828
NM_010376	H13	0.62185	5.46212e-05	0.00037123
NM_001159552	H13	-1.11272	0.000330955	0.00189818
NM_013543	H2-Ke6	-1.29529	4.33395e-10	6.33651e-09
NM_001143689	H2-Q4	-1.06839	4.95747e-07	4.85393e-06
NM_029938	H2afv	-1.01791	4.60146e-13	9.12477e-12
NM_207000	H2afy2	-1.84917	5.67923e-29	3.07677e-27
NM_173371	H6pd	-1.47224	2.22219e-14	5.015e-13
NM_001012396	Hacd1	1.27966	1.24957e-06	1.14869e-05
NM_013935	Hacd1	1.66331	0.00213312	0.00993078
NM_021345	Hacd3	0.582415	3.63174e-05	0.000255226
NM_172473	Hace1	0.801226	6.09934e-05	0.000409798
NM_019975	Hacl1	-0.686031	0.000432622	0.00241403
NM_008212	Hadh	-0.584201	0.000207425	0.0012466
NM_178878	Hadha	-0.555884	1.58368e-05	0.000119998
NM_026897	Haghl	-1.25687	2.03579e-06	1.81035e-05
NM_008214	Hars	0.542482	0.000129675	0.000815574
NM_008216	Has2	8.20796	1.56883e-128	1.55223e-125
NM_025475	Haus2	0.992872	9.4907e-06	7.49331e-05
NM_146159	Haus3	0.829018	1.32813e-05	0.000101866
NM_145462	Haus4	-1.029	5.1721e-08	5.78407e-07
NM_028633	Haus7	0.789832	0.00215684	0.0100263
NM_134250	Havcr2	2.8613	5.01409e-11	8.15397e-10
NM_011826	Hax1	0.696027	4.62245e-05	0.000319007
NM_010415	Hbegf	1.28325	2.87832e-22	1.08219e-20
NM_153198	Hbp1	-0.647473	1.23161e-06	1.13292e-05
NM_008222	Hccs	0.646006	0.00586125	0.0240896
NM_008224	Hcfc1	0.33646	0.0111781	0.0418933
NM_181821	Hcfc1r1	-0.835205	1.03308e-10	1.61706e-09
NM_001081218	Hcfc2	0.548729	0.00181688	0.00863165
NM_144919	Hdac11	-1.16449	9.02942e-11	1.42164e-09
NM_008229	Hdac2	0.437071	0.00214698	0.00998789
NM_013886	Hdgfrp3	-1.15211	6.74527e-12	1.21577e-10
NM_133808	Hdlbp	1.05561	8.49382e-17	2.27458e-15
NM_144835	Heatr1	0.917714	4.68998e-08	5.26685e-07
NM_177171	Heatr5a	0.992772	7.01057e-12	1.25876e-10
NM_001081179	Heatr5b	0.492949	0.00135861	0.00668424
NM_019487	Hebp2	0.614952	0.00108019	0.00547935
NM_001033432	Heca	0.756273	0.000100498	0.000647009
NM_175244	Hectd3	-0.706202	2.42998e-06	2.13663e-05
NM_001081348	Hecw1	-1.93474	2.72889e-14	6.07824e-13
NM_198298	Helz	-0.548354	0.00195206	0.00918336
NM_133984	Hemk1	-0.836071	0.000261678	0.00153824
[truncated: 3,142 more rows]
